# Supplementary material for: The effect of halides and coordination mode of 4-amino-2,1,3-benzothiadiazole on the luminescence properties of its Zn complexes
Source: Royal Society of Chemistry journal article supplement (doi:10.1039/d2ce01215d), 2022-01-01
Supplement: d2ce01215d1.pdf [file d2ce01215d1.pdf]

## Supporting Information

### The effect of halides and coordination mode of 4-amino-2,1,3-benzothiadiazole on the luminescence properties of its Zn complexes

by E. K. Pylova, R. M. Khisamov, D. A. Bashirov, T. S. Sukhikh and S. N. Konchenko

|                                                                                                                                                                                                                                                   |    |
|---------------------------------------------------------------------------------------------------------------------------------------------------------------------------------------------------------------------------------------------------|----|
| Table S1. Crystal data and structure refinement for the compounds. ....                                                                                                                                                                           | 4  |
| Figure S1. Reciprocal space reconstructions for <b>4</b> . ....                                                                                                                                                                                   | 5  |
| Figure S2. (a) Crystal packing of the superstructure of <b>4</b> . ....                                                                                                                                                                           | 5  |
| Figure S3. Experimental and simulated powder XRD patterns (Cu K $\alpha$ radiation) for [ZnL <sub>2</sub> Br <sub>2</sub> ] ( <b>1</b> ). ....                                                                                                    | 6  |
| Figure S4. Experimental powder XRD pattern (Cu K $\alpha$ radiation) for a sample from the reaction between ZnBr <sub>2</sub> and L in a molar ratio of 1:1. ....                                                                                 | 6  |
| Figure S5. Experimental and simulated powder XRD patterns (Cu K $\alpha$ radiation) for [ZnL <sub>2</sub> I <sub>2</sub> ] ( <b>3</b> ). ....                                                                                                     | 7  |
| Figure S6. Experimental and simulated powder XRD patterns (Cu K $\alpha$ radiation) for [ZnLI <sub>2</sub> ] <sub>n</sub> ( <b>4</b> ). ....                                                                                                      | 7  |
| Figure S7. Intermolecular interactions between <i>btd</i> moieties in the structure of <b>1</b> . ....                                                                                                                                            | 8  |
| Figure S8. Intermolecular interactions in the structure of <b>2</b> . ....                                                                                                                                                                        | 8  |
| Figure S9. Intermolecular interactions in the structure of <b>3</b> . ....                                                                                                                                                                        | 9  |
| Figure S10. Intermolecular interactions in the structure of <b>4</b> . ....                                                                                                                                                                       | 9  |
| Figure S11. TG, DTG and DTA curves depicting thermal decomposition of [ZnL <sub>2</sub> Br <sub>2</sub> ] ( <b>1</b> ). ....                                                                                                                      | 10 |
| Figure S12. TG, DTG and DTA curves depicting thermal decomposition of [ZnL <sub>2</sub> I <sub>2</sub> ] ( <b>3</b> ). ....                                                                                                                       | 10 |
| Figure S13. TG, DTG and DTA curves depicting thermal decomposition of [ZnLI <sub>2</sub> ] <sub>n</sub> ( <b>4</b> ). ....                                                                                                                        | 11 |
| Figure S14. TG, DTG and DTA curves depicting thermal decomposition of free L. ....                                                                                                                                                                | 11 |
| Figure S15. Emission and excitation spectra for solid compounds <b>1</b> , <b>3</b> and <b>4</b> . ....                                                                                                                                           | 12 |
| Figure S16. Emission spectra of powder <b>1</b> upon aging for 1.5 months. ....                                                                                                                                                                   | 12 |
| Figure S17. Emission decay curve for <b>1</b> and the corresponding fit by two exponential decay. ....                                                                                                                                            | 13 |
| Figure S18. Emission and excitation spectra of powder <b>1</b> and film of <b>1</b> in polystyrene matrix. ....                                                                                                                                   | 13 |
| Table S2. Calculated properties of the first singlet excited states S <sub>0</sub> → S <sub>n</sub> of [ZnL <sub>2</sub> Br <sub>2</sub> ] ( <b>1</b> ) at B3LYP/def2-TZVPP and PBE0/def2-TZVPP level. ....                                       | 14 |
| Table S3. Calculated properties of the first singlet excited states S <sub>0</sub> → S <sub>n</sub> of [ZnL <sub>2</sub> Br <sub>2</sub> ] ( <b>1</b> ) at wB97XD/def2-TZVPP and CAM-B3LYP/def2-TZVPP level. ....                                 | 15 |
| Table S4. Calculated properties of the first singlet excited states S <sub>0</sub> → S <sub>n</sub> of [ZnL <sub>2</sub> Cl <sub>2</sub> ] at B3LYP/def2-TZVPP level. ....                                                                        | 16 |
| Table S5. Calculated properties of the first singlet excited states S <sub>0</sub> → S <sub>n</sub> of [ZnL <sub>2</sub> I <sub>2</sub> ] ( <b>3</b> ) at B3LYP/def2-TZVPP and PBE0/def2-TZVPP level. ....                                        | 17 |
| Table S6. Calculated properties of the first singlet excited states S <sub>0</sub> → S <sub>n</sub> of [ZnL <sub>2</sub> I <sub>2</sub> ] ( <b>3</b> ) at wB97XD/def2-TZVPP and CAM-B3LYP/def2-TZVPP level. ....                                  | 18 |
| Table S7. Calculated properties of the first singlet excited states S <sub>0</sub> → S <sub>n</sub> of [Zn <sub>3</sub> L <sub>2</sub> (NH <sub>3</sub> ) <sub>2</sub> I <sub>6</sub> ] at B3LYP/def2-TZVPP and PBE0/def2-TZVPP level. ....       | 19 |
| Table S8. Calculated properties of the first singlet excited states S <sub>0</sub> → S <sub>n</sub> of [Zn <sub>3</sub> L <sub>2</sub> (NH <sub>3</sub> ) <sub>2</sub> I <sub>6</sub> ] at wB97XD/def2-TZVPP and CAM-B3LYP/def2-TZVPP level. .... | 20 |
| Table S9. Calculated properties of the first singlet excited states S <sub>0</sub> → S <sub>n</sub> of [Zn <sub>4</sub> L <sub>3</sub> (NH <sub>3</sub> ) <sub>2</sub> I <sub>8</sub> ] at B3LYP/def2-TZVPP and PBE0/def2-TZVPP level. ....       | 21 |

|                                                                                                                                                                                                            |    |
|------------------------------------------------------------------------------------------------------------------------------------------------------------------------------------------------------------|----|
| Table S10. Calculated properties of the first singlet excited states $S_0 \rightarrow S_n$ of $[\text{Zn}_4\text{L}_3(\text{NH}_3)_2\text{I}_8]$ at wB97XD/def2-TZVPP and CAM-B3LYP/def2-TZVPP level ..... | 22 |
| Table S11. Calculated properties of the first singlet excited states $S_0 \rightarrow S_n$ of $[\text{ZnLI}_2]_n$ ( <b>4</b> ) with B3LYP functional. ....                                                 | 23 |
| Figure S19. Decomposition of 10 vertical excitation states for $[\text{ZnL}_2\text{Br}_2]$ ( <b>1</b> ) in terms of contribution from excitation types. ....                                               | 24 |
| Figure S20. Decomposition of 10 vertical excitation states for $[\text{ZnL}_2\text{I}_2]$ ( <b>3</b> ) in terms of contribution from excitation types. ....                                                | 24 |
| Figure S21. Frontier orbitals of $[\text{ZnL}_2\text{Br}_2]$ ( <b>1</b> ).....                                                                                                                             | 25 |
| Figure S22. Frontier orbitals of $[\text{ZnL}_2\text{Cl}_2]$ .....                                                                                                                                         | 25 |
| Figure S23. Frontier orbitals of $[\text{ZnL}_2\text{I}_2]$ ( <b>3</b> ) .....                                                                                                                             | 26 |
| Figure S24. Frontier orbitals of $[\text{ZnLI}_2]_n$ .( <b>4</b> ) .....                                                                                                                                   | 27 |
| Figure S25. Frontier molecular orbitals of $[\text{Zn}_3\text{L}_2(\text{NH}_3)_2\text{I}_6]$ and $[\text{Zn}_4\text{L}_3(\text{NH}_3)_2\text{I}_8]$ .....                                                 | 28 |
| Figure S26. Overlay of optimized geometry of complex <b>1</b> in the ground state and $S_1$ state. ....                                                                                                    | 29 |
| Figure S27. Overlay of optimized geometry of complex <b>3</b> in the ground state and $S_1$ state. ....                                                                                                    | 29 |
| Figure S28. Infrared spectra of polystyrene (PS), L in PS film and <b>1</b> in PS film.. ....                                                                                                              | 30 |

Table S1. Crystal data and structure refinement for the compounds.

| Identification code                         | 1                                                                                | 2                                                                | 3                                                                               | 4                                                               | 4(superstr.)                                                    |
|---------------------------------------------|----------------------------------------------------------------------------------|------------------------------------------------------------------|---------------------------------------------------------------------------------|-----------------------------------------------------------------|-----------------------------------------------------------------|
| Empirical formula                           | C <sub>12</sub> H <sub>10</sub> Br <sub>2</sub> N <sub>6</sub> S <sub>2</sub> Zn | C <sub>6</sub> H <sub>5</sub> Br <sub>2</sub> N <sub>3</sub> SZn | C <sub>12</sub> H <sub>10</sub> l <sub>2</sub> N <sub>6</sub> S <sub>2</sub> Zn | C <sub>6</sub> H <sub>5</sub> l <sub>2</sub> N <sub>3</sub> SZn | C <sub>6</sub> H <sub>5</sub> l <sub>2</sub> N <sub>3</sub> SZn |
| Formula weight                              | 527.57                                                                           | 376.38                                                           | 621.55                                                                          | 470.36                                                          | 470.36                                                          |
| Temperature/K                               | 296(2)                                                                           | 150(2)                                                           | 296(2)                                                                          | 150(2)                                                          | 150(2)                                                          |
| Crystal system                              | monoclinic                                                                       | triclinic                                                        | triclinic                                                                       | monoclinic                                                      | monoclinic                                                      |
| Space group                                 | <i>C2/c</i>                                                                      | <i>P-1</i>                                                       | <i>P-1</i>                                                                      | <i>Cc</i>                                                       | <i>Cc</i>                                                       |
| a/Å                                         | 27.4418(12)                                                                      | 5.9710(5)                                                        | 7.539(3)                                                                        | 14.5768(5)                                                      | 14.5782(6)                                                      |
| b/Å                                         | 4.7724(2)                                                                        | 7.5328(7)                                                        | 11.020(5)                                                                       | 10.8025(4)                                                      | 32.4028(12)                                                     |
| c/Å                                         | 12.8595(5)                                                                       | 11.7015(10)                                                      | 12.373(6)                                                                       | 7.0493(2)                                                       | 7.0488(3)                                                       |
| α/°                                         | 90                                                                               | 79.032(3)                                                        | 101.973(16)                                                                     | 90                                                              | 90                                                              |
| β/°                                         | 102.417(2)                                                                       | 78.762(3)                                                        | 101.819(16)                                                                     | 95.8400(10)                                                     | 95.846(2)                                                       |
| γ/°                                         | 90                                                                               | 77.370(3)                                                        | 109.720(15)                                                                     | 90                                                              | 90                                                              |
| Volume/Å <sup>3</sup>                       | 1644.73(12)                                                                      | 497.70(8)                                                        | 903.5(7)                                                                        | 1104.26(6)                                                      | 3312.4(2)                                                       |
| Z                                           | 4                                                                                | 2                                                                | 2                                                                               | 4                                                               | 12                                                              |
| ρ <sub>calc</sub> /cm <sup>3</sup>          | 2.131                                                                            | 2.512                                                            | 2.285                                                                           | 2.829                                                           | 2.830                                                           |
| μ/mm <sup>-1</sup>                          | 6.612                                                                            | 10.658                                                           | 5.013                                                                           | 7.963                                                           | 7.964                                                           |
| F(000)                                      | 1024.0                                                                           | 356.0                                                            | 584.0                                                                           | 856.0                                                           | 2568.0                                                          |
| Crystal size/mm <sup>3</sup>                | 0.42 × 0.03 × 0.03                                                               | 0.22 × 0.17 × 0.08                                               | 0.13 × 0.08 × 0.05                                                              | 0.2 × 0.1 × 0.1                                                 | 0.2 × 0.1 × 0.1                                                 |
| Radiation                                   | MoKα (λ = 0.71073)                                                               | MoKα (λ = 0.71073)                                               | MoKα (λ = 0.71073)                                                              | MoKα (λ = 0.71073)                                              | MoKα (λ = 0.71073)                                              |
| 2θ range for data collection/°              | 6.08 to 52.824                                                                   | 3.592 to 56.062                                                  | 3.526 to 50.716                                                                 | 4.702 to 52.788                                                 | 3.076 to 52.76                                                  |
| Index ranges                                | -34 ≤ h ≤ 28, -5 ≤ k ≤ 5, -16 ≤ l ≤ 15                                           | -7 ≤ h ≤ 7, -9 ≤ k ≤ 9, -15 ≤ l ≤ 15                             | -9 ≤ h ≤ 8, -12 ≤ k ≤ 13, -14 ≤ l ≤ 14                                          | -18 ≤ h ≤ 17, -13 ≤ k ≤ 13, -8 ≤ l ≤ 8                          | -14 ≤ h ≤ 18, -30 ≤ k ≤ 40, -8 ≤ l ≤ 8                          |
| Reflections collected                       | 4139                                                                             | 4874                                                             | 8045                                                                            | 4156                                                            | 8493                                                            |
| Independent reflections                     | 1671 [R <sub>int</sub> = 0.0261, R <sub>sigma</sub> = 0.0321]                    | 2394 [R <sub>int</sub> = 0.0222, R <sub>sigma</sub> = 0.0305]    | 3207 [R <sub>int</sub> = 0.0337, R <sub>sigma</sub> = 0.0478]                   | 2009 [R <sub>int</sub> = 0.0738, R <sub>sigma</sub> = 0.0541]   | 5020 [R <sub>int</sub> = 0.0291, R <sub>sigma</sub> = 0.0488]   |
| Restraints/parameters                       | 0/111                                                                            | 2/124                                                            | 0/220                                                                           | 4/156                                                           | 137/342                                                         |
| Goodness-of-fit on F <sup>2</sup>           | 1.038                                                                            | 1.037                                                            | 1.003                                                                           | 1.080                                                           | 1.049                                                           |
| Final R indexes [I ≥ 2σ (I)]                | R <sub>1</sub> = 0.0245, wR <sub>2</sub> = 0.0577                                | R <sub>1</sub> = 0.0214, wR <sub>2</sub> = 0.0494                | R <sub>1</sub> = 0.0314, wR <sub>2</sub> = 0.0553                               | R <sub>1</sub> = 0.0337, wR <sub>2</sub> = 0.0782               | R <sub>1</sub> = 0.0566, wR <sub>2</sub> = 0.1464               |
| Final R indexes [all data]                  | R <sub>1</sub> = 0.0325, wR <sub>2</sub> = 0.0607                                | R <sub>1</sub> = 0.0260, wR <sub>2</sub> = 0.0508                | R <sub>1</sub> = 0.0514, wR <sub>2</sub> = 0.0609                               | R <sub>1</sub> = 0.0366, wR <sub>2</sub> = 0.0793               | R <sub>1</sub> = 0.0646, wR <sub>2</sub> = 0.1527               |
| Largest diff. peak/hole / e Å <sup>-3</sup> | 0.43/-0.41                                                                       | 0.81/-0.40                                                       | 0.56/-0.58                                                                      | 0.96/-0.47                                                      | 2.36/-0.97                                                      |
| Flack parameter                             |                                                                                  |                                                                  |                                                                                 | 0.41(6)                                                         | 0.37(7)                                                         |

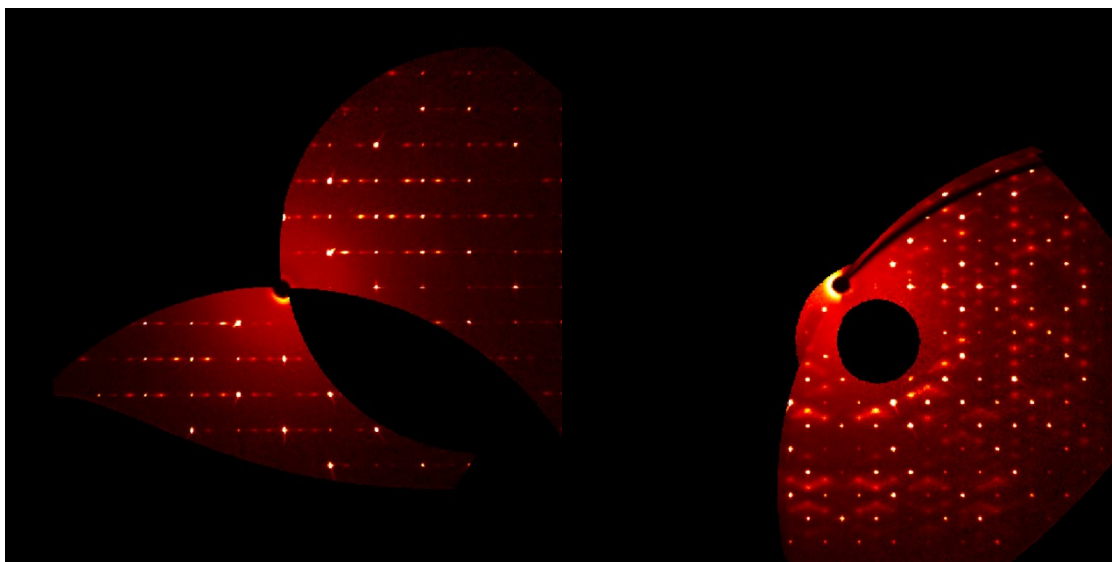

Figure S1. Reciprocal space reconstructions for **4**, the thickness of the layers of 0.10 Å. Left –  $0kl$  layer; right –  $hk0$  layer.

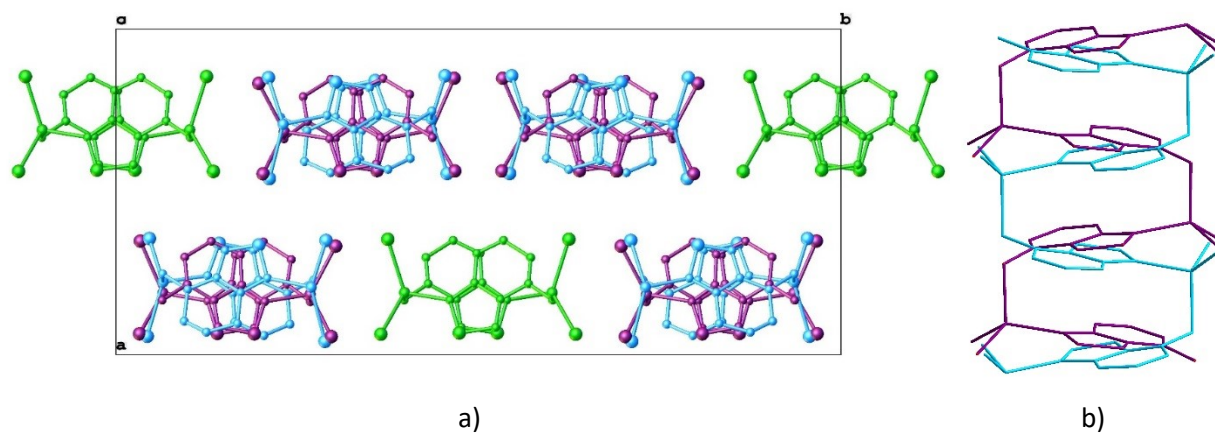

Figure S2. (a) Crystal packing of the superstructure of **4**. Ordered chains are coloured green, disordered ones are coloured blue and violet. (b) Representation of the disordered chain. Hydrogen atoms are omitted.

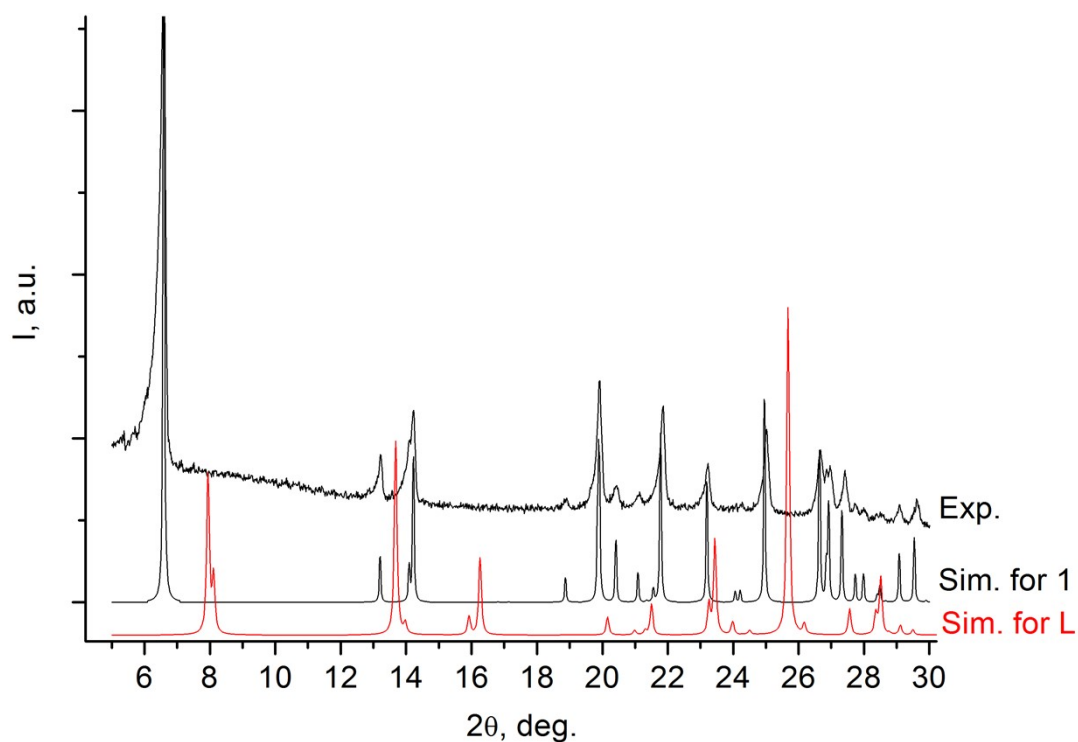

Figure S3. Experimental and simulated powder XRD patterns (Cu K $\alpha$  radiation) for [ZnL<sub>2</sub>Br<sub>2</sub>] (**1**). No impurities of solid L is revealed within the accuracy of the method.

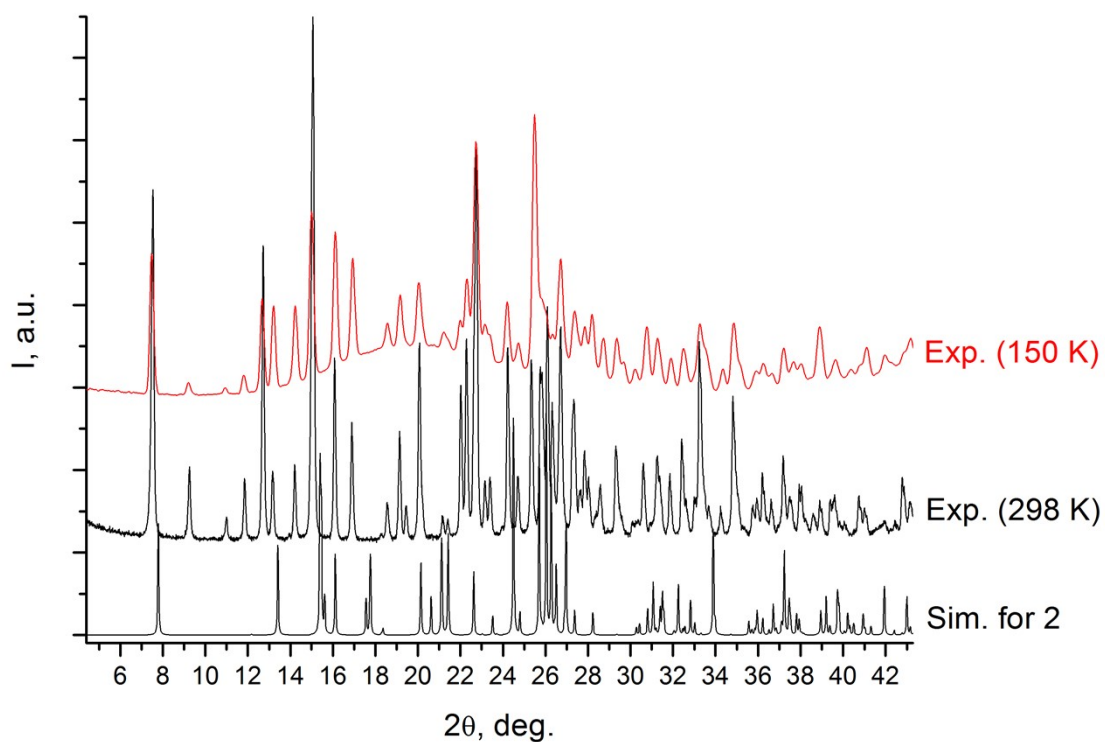

Figure S4. Experimental powder XRD pattern (Cu K $\alpha$  radiation) for a sample from the reaction between ZnBr<sub>2</sub> and L in a molar ratio of 1:1, measured at 298 K (on a Bruker D8 Advance diffractometer) and 150 K (on a Bruker D8 Venture diffractometer). The compound does not correspond to the phase [ZnLBr<sub>2</sub>] (**2**); the difference in the position of the peaks cannot be ascribed to temperature effects, while no phase transition is observed in the temperature range of 150 – 298K.

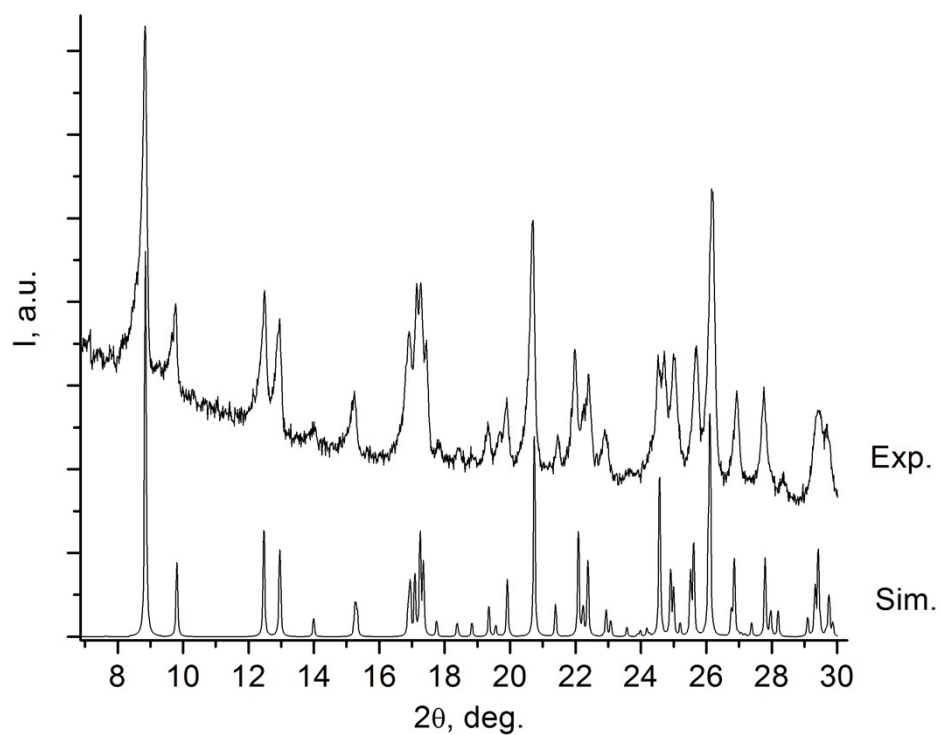

Figure S5. Experimental and simulated powder XRD patterns (Cu K $\alpha$  radiation) for [ZnL<sub>2</sub>]<sub>2</sub> (**3**).

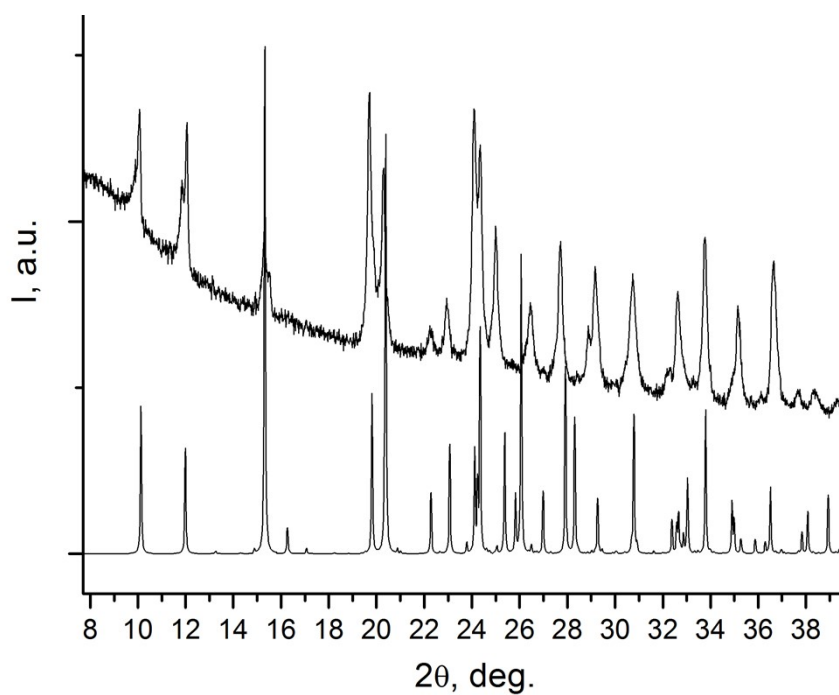

Figure S6. Experimental and simulated powder XRD patterns (Cu K $\alpha$  radiation) for [ZnLi<sub>2</sub>]<sub>n</sub> (**4**).

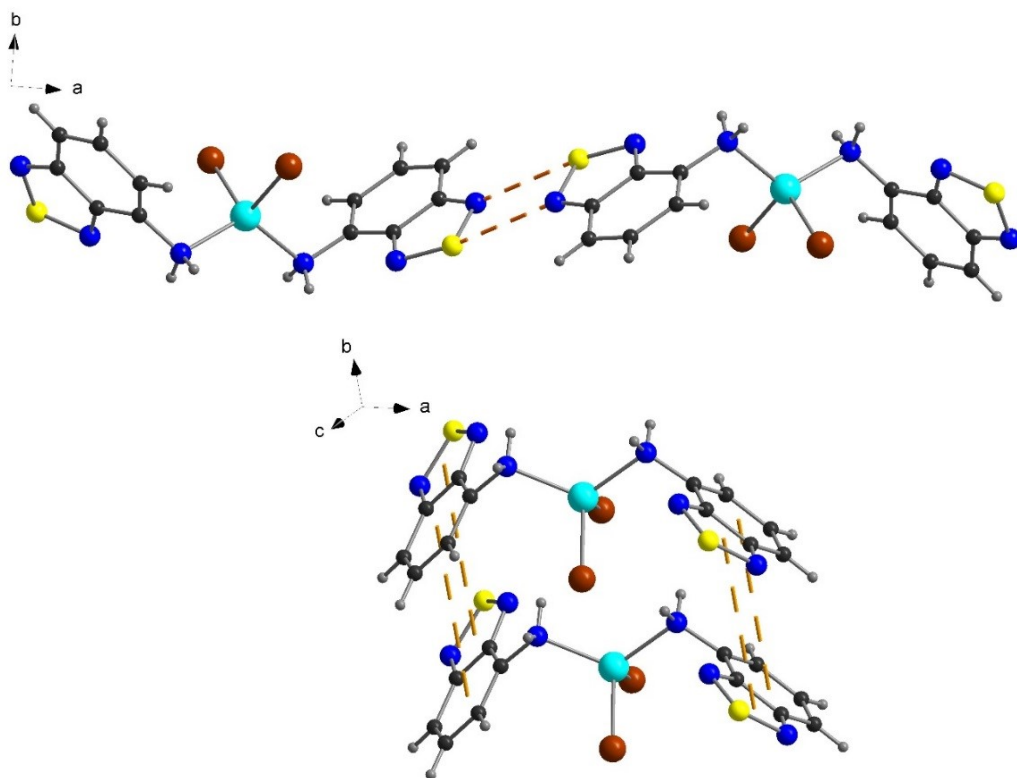

Figure S7. Intermolecular interactions between *btd* moieties in the structure of **1** highlighted by orange dashed lines. Top – S...N contacts (3.16 Å). Bottom –  $\pi$ - $\pi$  interactions (interplanar separation of 3.37 Å).

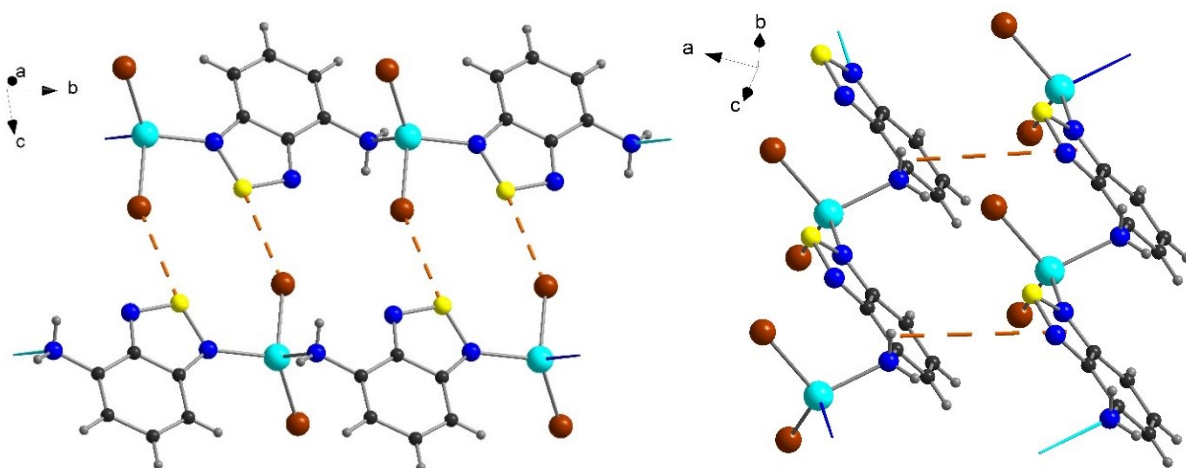

Figure S8. Intermolecular interactions in the structure of **2** highlighted by orange dashed lines. Left – S...Br contacts (3.37 Å). Right –  $\pi$ - $\pi$  interactions (interplanar separation of 3.50 Å).

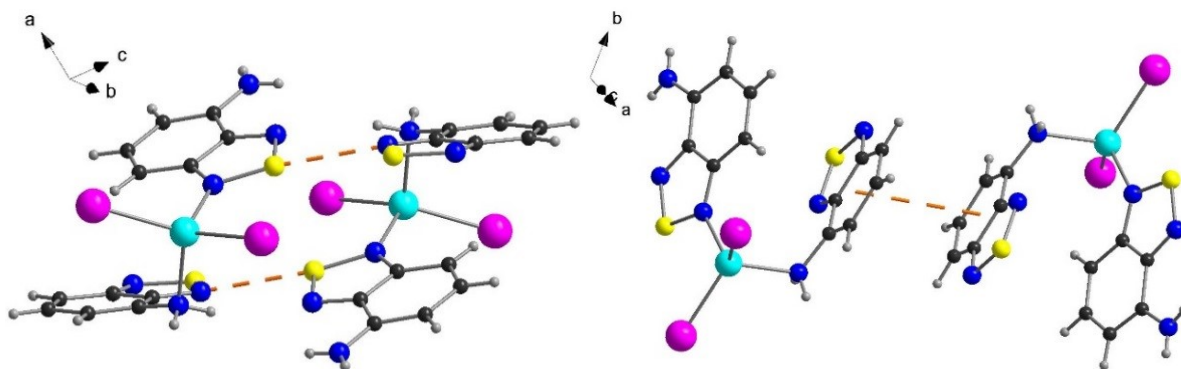

Figure S9. Intermolecular interactions in the structure of **3** highlighted by orange dashed lines. Left – S $\cdots$ N contacts (2.97 Å). Right –  $\pi$ - $\pi$  interactions (interplanar separation of 3.40 Å).

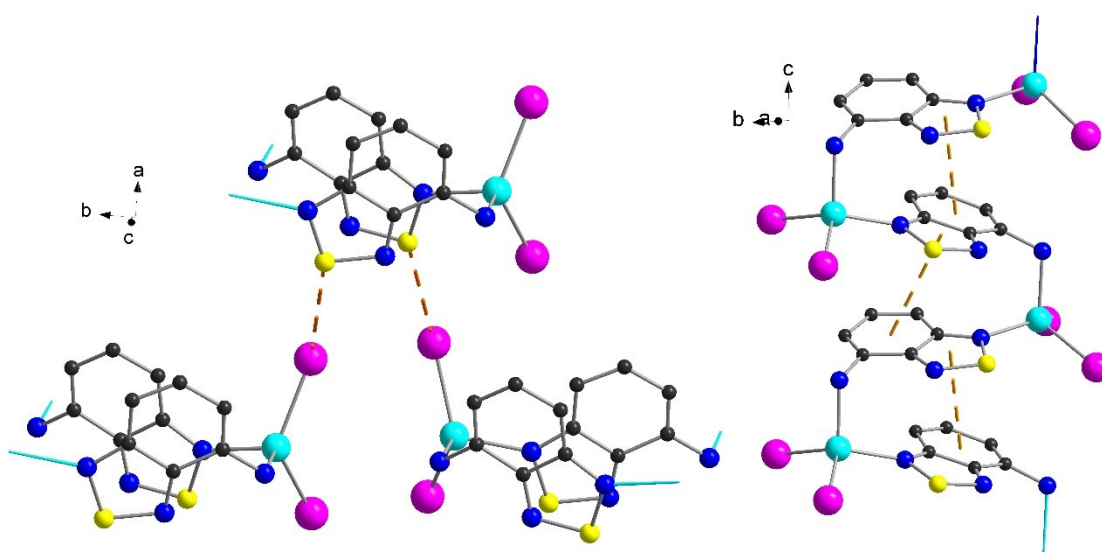

Figure S10. Intermolecular interactions in the structure of **4** highlighted by orange dashed lines. Left – S $\cdots$ I contacts (3.75 Å). Right –  $\pi$ - $\pi$  interactions (interplanar separation of ca. 3.3 Å).



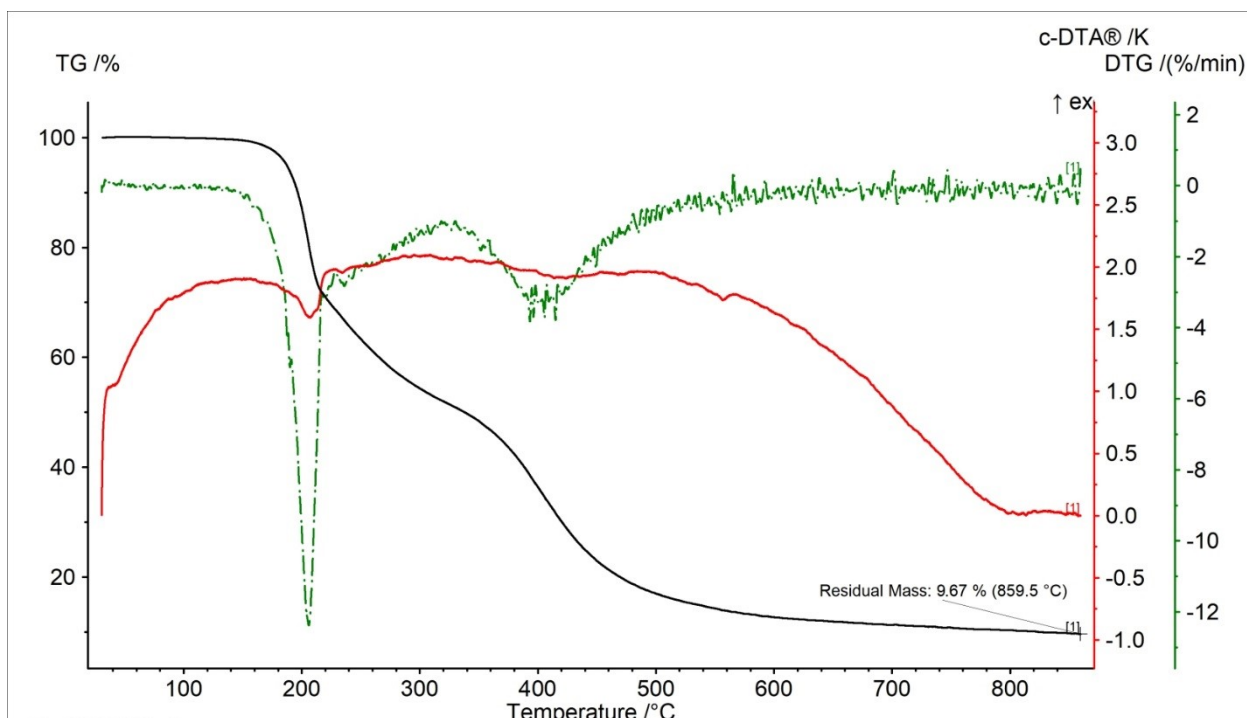

Figure S11. TG (black line), DTG (green line) and DTA (red line) curves depicting thermal decomposition of  $[\text{ZnL}_2\text{Br}_2]$  (**1**). The first step at 170–220°C corresponds to loss of the first L molecule per complex (experimental / calculated mass loss of 30 / 28.7%), the second and the third poorly resolved steps at 220–850°C correspond to loss of the second L and sublimation of  $\text{ZnBr}_2$ .

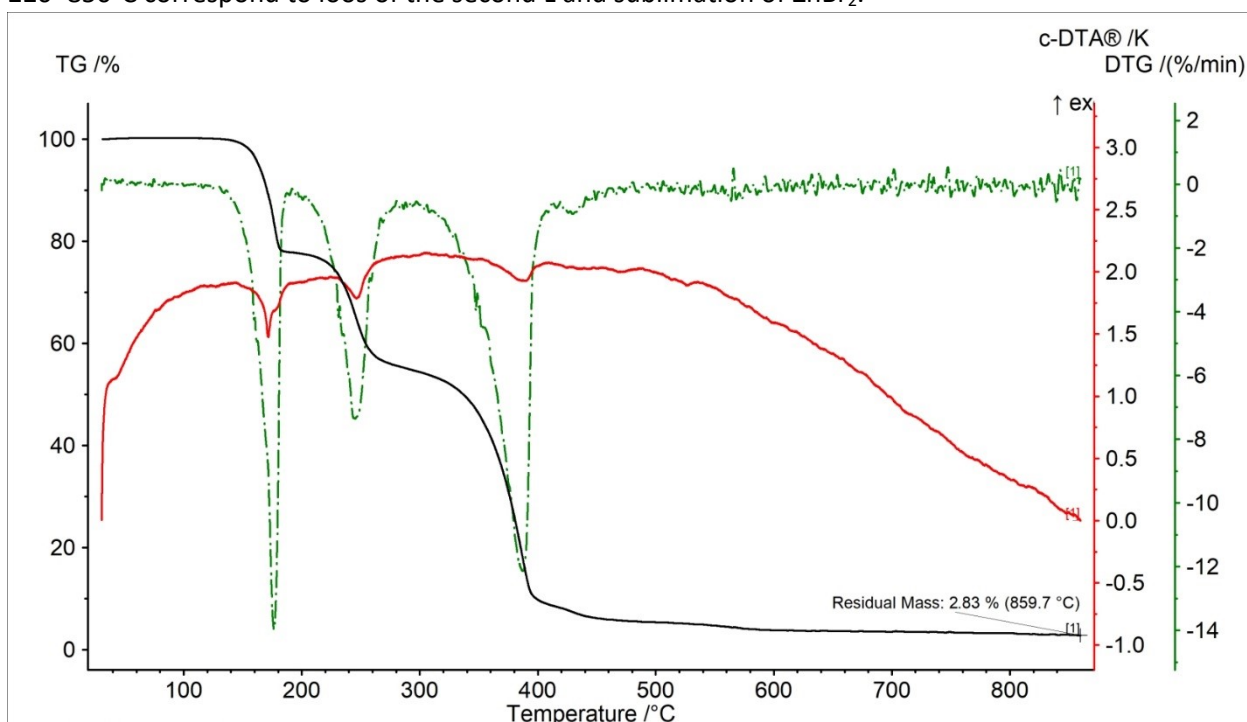

Figure S12. TG (black line), DTG (green line) and DTA (red line) curves depicting thermal decomposition of  $[\text{ZnL}_2\text{I}_2]$  (**3**). The first step at 140–190°C corresponds to loss of the first L molecule per complex (experimental / calculated mass loss of 23 / 24.3%), the second one at 200–285 °C corresponds to loss of the second L (experimental / calculated mass loss of 46 / 48.6%) and the third step at 285–600°C corresponds to sublimation of  $\text{ZnI}_2$ .

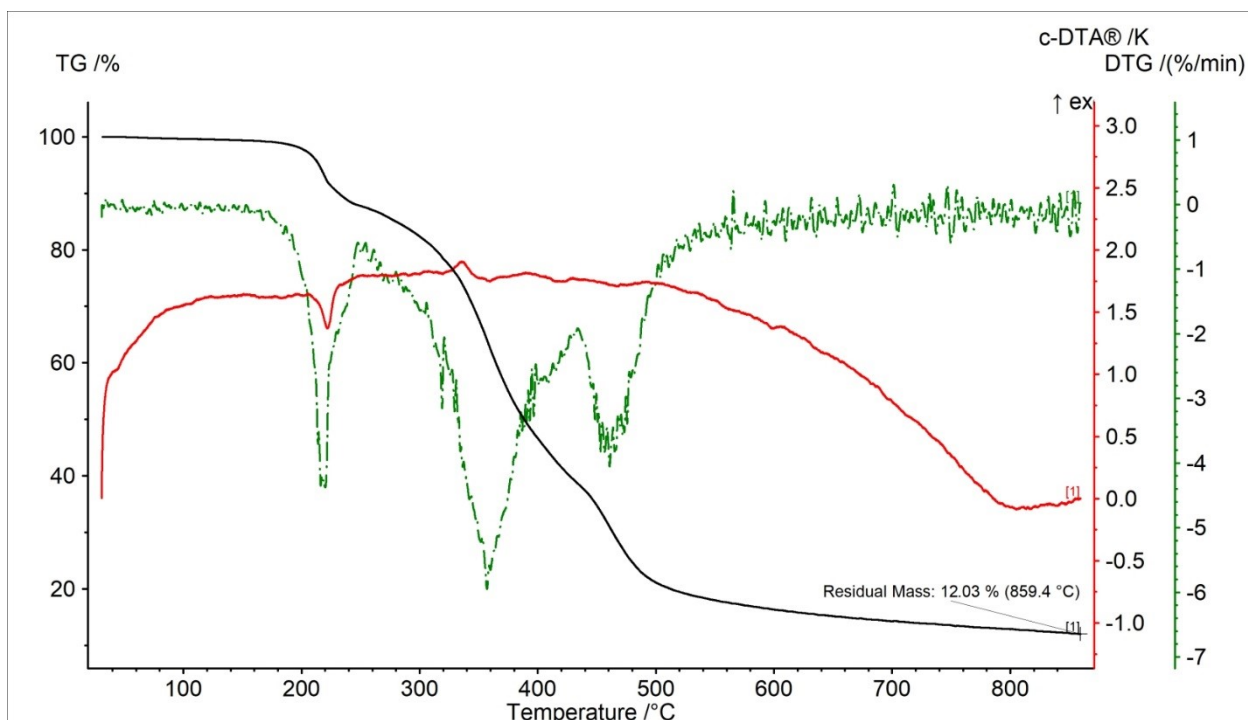

Figure S13. TG (black line), DTG (green line) and DTA (red line) curves depicting thermal decomposition of  $[\text{ZnLi}_2]_n$  (**4**). The first step at 180–245°C (mass loss of 12%), the second step at 245–435°C (mass loss of 12%) and the third step at 435–850°C (mass loss of 78%) are not assigned.

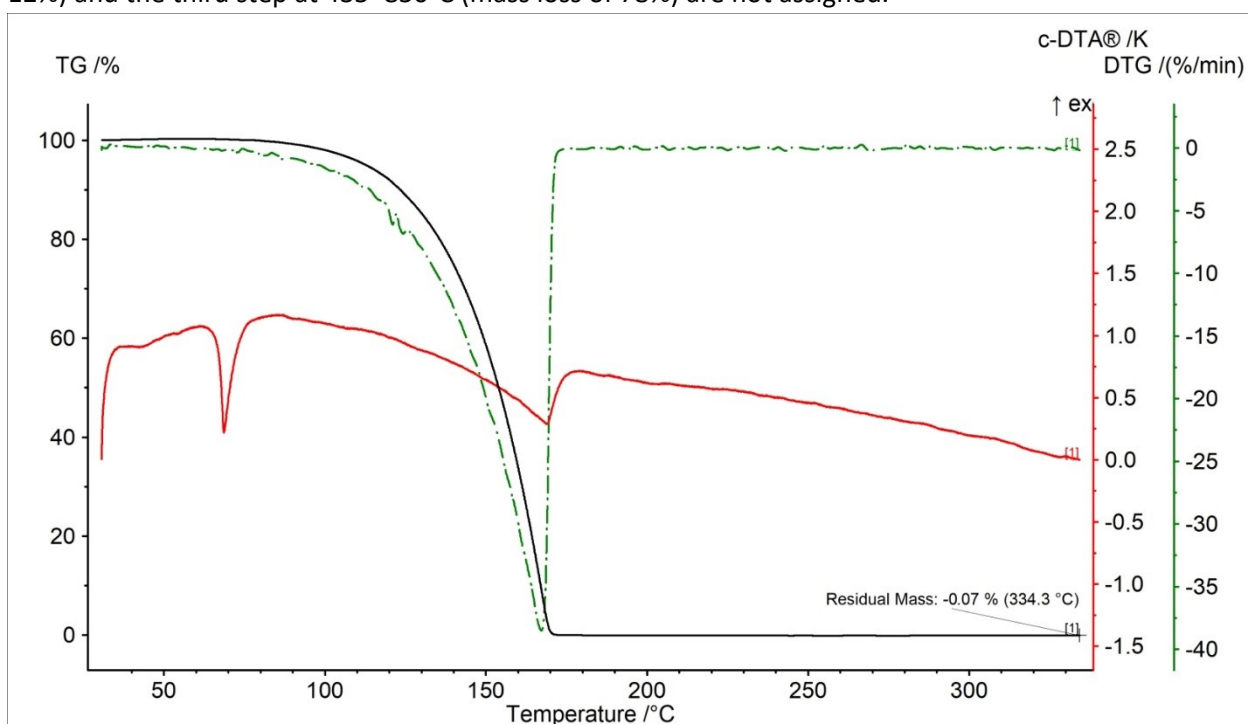

Figure S14. TG (black line), DTG (green line) and DTA (red line) curves depicting thermal decomposition of free L. In the DTA curve, the first endothermic peak at 68 °C corresponds to melting of L, while the second peak at 168 °C corresponds to evaporation of L.

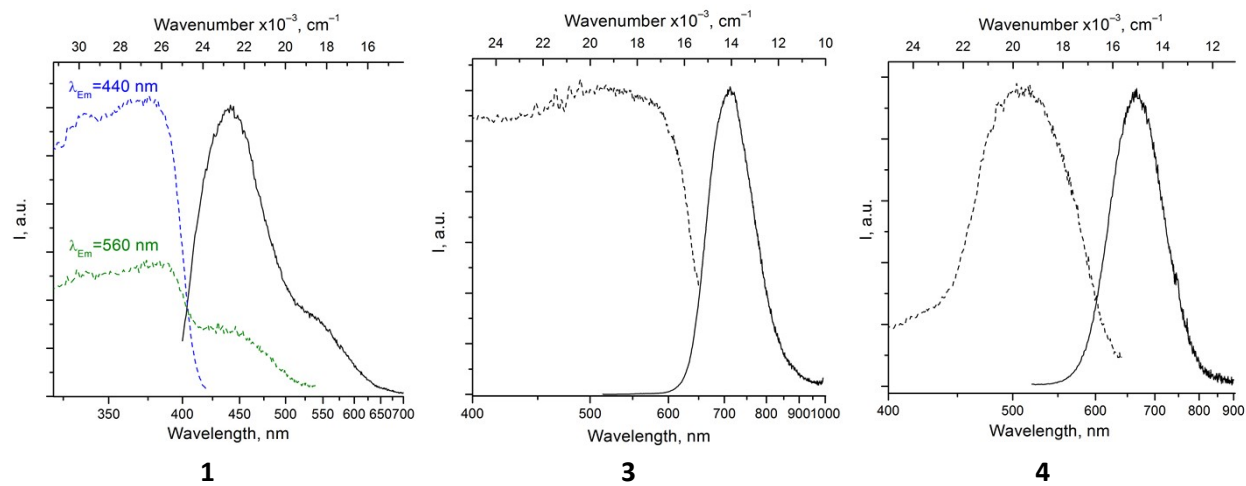

Figure S15. Emission (solid lines) and excitation (dashed lines) spectra for solid compounds **1**, **3** and **4**. For **1**, the excitation spectra are presented for both emission bands at 440 and 560 nm.

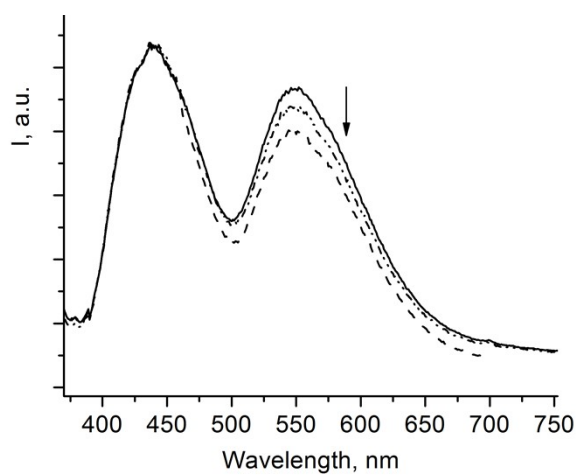

Figure S16. Emission spectra of powder **1** upon aging for 1.5 months. The spectra are normalized on the short wavelength band.

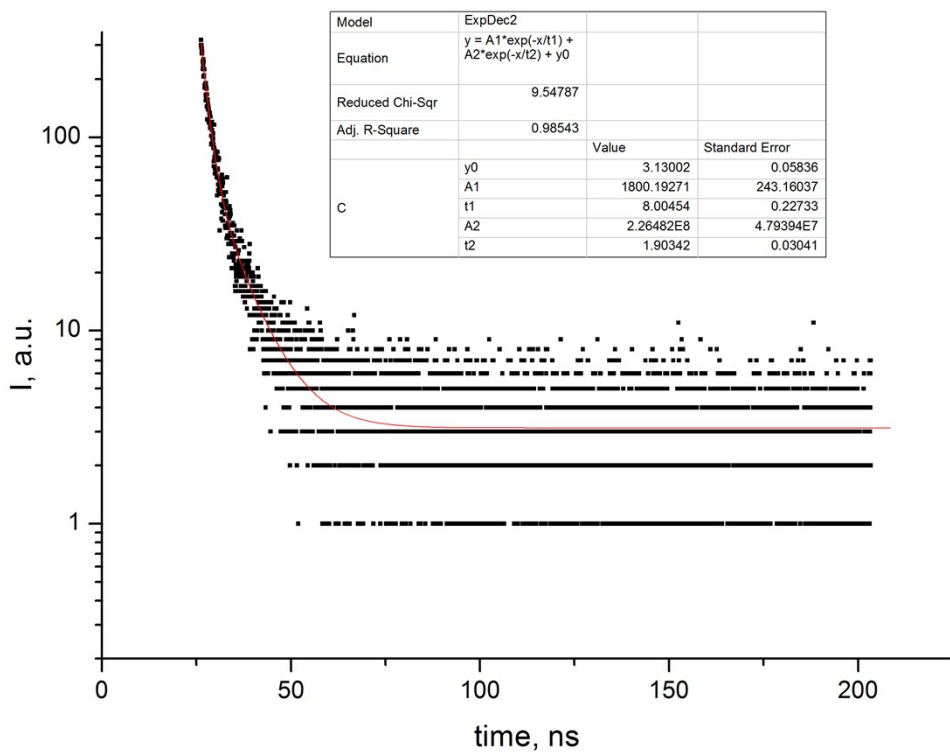

Figure S17. Emission decay curve (black) for **1** and the corresponding fit by two exponential decay (red)

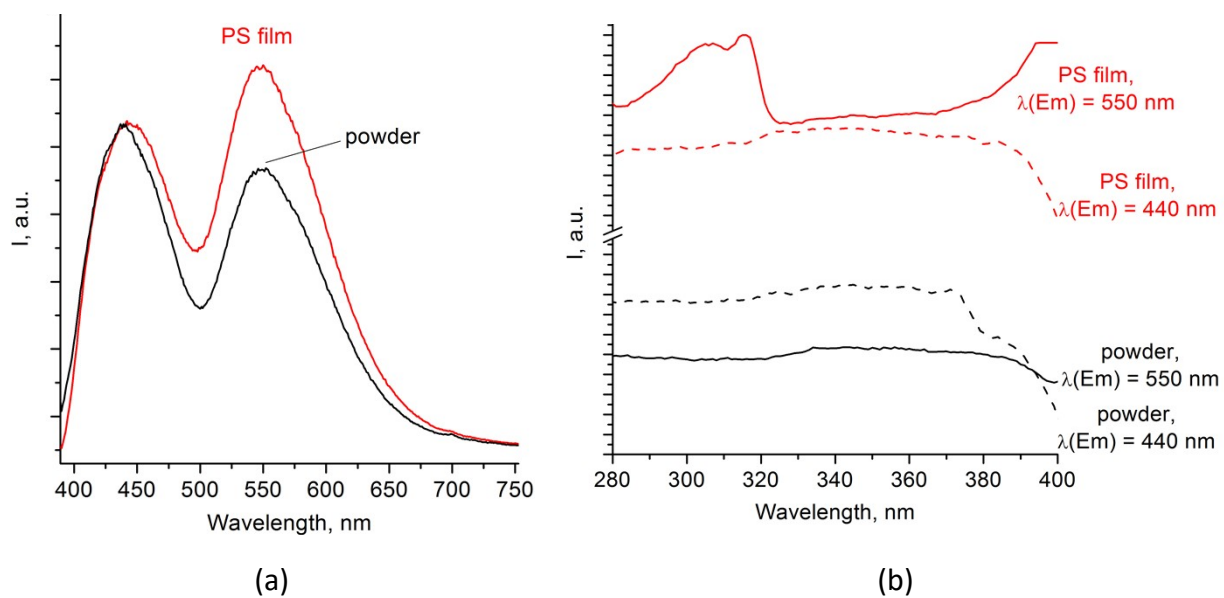

Figure S18. Normalized emission (excitation at 350 nm; a) and excitation (at two emission wavelengths; b) spectra of powder **1** and film of **1** in polystyrene matrix.

Table S2. Calculated properties of the first singlet excited states  $S_0 \rightarrow S_n$  of  $[\text{ZnL}_2\text{Br}_2]$  (**1**) at B3LYP/def2-TZVPP and PBE0/def2-TZVPP level: transition wavelength ( $\lambda$ ), oscillator strength (f). H is for HOMO, L is for LUMO abbreviation. The contribution of the individual excitations is listed if larger than 0.1

| n  | B3LYP          |        |                        |              | PBE0           |        |                        |              |
|----|----------------|--------|------------------------|--------------|----------------|--------|------------------------|--------------|
|    | $\lambda$ , nm | f      | electronic states      | contribution | $\lambda$ , nm | f      | electronic states      | contribution |
| 1  | 377.5          | 0.1088 | H-1 $\rightarrow$ L+1  | 0.2097       | 363.7          | 0.1197 | H-1 $\rightarrow$ L+1  | 0.2839       |
|    |                |        | H $\rightarrow$ L      | 0.7696       |                |        | H $\rightarrow$ L      | 0.6958       |
| 2  | 374.1          | 0.0088 | H-1 $\rightarrow$ L    | 0.3687       | 360.5          | 0.0103 | H-1 $\rightarrow$ L    | 0.3816       |
|    |                |        | H $\rightarrow$ L+1    | 0.6036       |                |        | H $\rightarrow$ L+1    | 0.5959       |
| 3  | 361.9          | 0.0001 | H-1 $\rightarrow$ L    | 0.5639       | 336.6          | 0.0000 | H-1 $\rightarrow$ L    | 0.5480       |
|    |                |        | H $\rightarrow$ L+1    | 0.3694       |                |        | H $\rightarrow$ L+1    | 0.3519       |
| 4  | 360.6          | 0.0000 | H-1 $\rightarrow$ L+1  | 0.6945       | 335.6          | 0.0005 | H-1 $\rightarrow$ L+1  | 0.6167       |
|    |                |        | H $\rightarrow$ L      | 0.2013       |                |        | H $\rightarrow$ L      | 0.2482       |
| 5  | 349            | 0.0027 | H-3 $\rightarrow$ L+1  | 0.1074       | 325.3          | 0.0030 | H-3 $\rightarrow$ L+1  | 0.1646       |
|    |                |        | H-2 $\rightarrow$ L    | 0.7790       |                |        | H-2 $\rightarrow$ L    | 0.6777       |
| 6  | 347.3          | 0.0003 | H-3 $\rightarrow$ L    | 0.3742       | 324.3          | 0.0014 | H-3 $\rightarrow$ L    | 0.4554       |
|    |                |        | H-2 $\rightarrow$ L+1  | 0.5203       |                |        | H-2 $\rightarrow$ L+1  | 0.3955       |
| 7  | 341.9          | 0.0032 | H-3 $\rightarrow$ L    | 0.4583       | 318.8          | 0.0054 | H-4 $\rightarrow$ L    | 0.2624       |
|    |                |        | H-2 $\rightarrow$ L+1  | 0.3911       |                |        | H-3 $\rightarrow$ L+1  | 0.5140       |
| 8  | 341.4          | 0.0043 | H-4 $\rightarrow$ L    | 0.2363       | 318.7          | 0.0034 | H-4 $\rightarrow$ L+1  | 0.1072       |
|    |                |        | H-3 $\rightarrow$ L+1  | 0.6231       |                |        | H-3 $\rightarrow$ L    | 0.3308       |
| 9  | 325.9          | 0.0070 | H-2 $\rightarrow$ L    | 0.1131       | 303.3          | 0.0103 | H-2 $\rightarrow$ L+1  | 0.4669       |
|    |                |        | H-4 $\rightarrow$ L    | 0.7195       |                |        | H-4 $\rightarrow$ L    | 0.6543       |
| 10 | 324.5          | 0.0000 | H-3 $\rightarrow$ L+1  | 0.2545       | 302.3          | 0.0001 | H-3 $\rightarrow$ L+1  | 0.2986       |
|    |                |        | H-4 $\rightarrow$ L+1  | 0.7748       |                |        | H-5 $\rightarrow$ L    | 0.1354       |
| 11 | 320            | 0.0012 | H-3 $\rightarrow$ L    | 0.1483       | 299.2          | 0.0006 | H-4 $\rightarrow$ L+1  | 0.6367       |
|    |                |        | H-5 $\rightarrow$ L    | 0.8510       |                |        | H-3 $\rightarrow$ L    | 0.1782       |
| 12 | 317.9          | 0.0016 | H-5 $\rightarrow$ L    | 0.8510       | 297.5          | 0.0012 | H-5 $\rightarrow$ L    | 0.7275       |
|    |                |        | H-5 $\rightarrow$ L+1  | 0.9139       |                |        | H-4 $\rightarrow$ L+1  | 0.1705       |
| 13 | 282.4          | 0.1208 | H-5 $\rightarrow$ L+1  | 0.9139       | 275.9          | 0.2059 | H-5 $\rightarrow$ L+1  | 0.8723       |
|    |                |        | H-6 $\rightarrow$ L    | 0.8881       |                |        | H-7 $\rightarrow$ L+1  | 0.2989       |
| 14 | 280.7          | 0.1021 | H-6 $\rightarrow$ L    | 0.8881       | 275.5          | 0.1107 | H-6 $\rightarrow$ L    | 0.5550       |
|    |                |        | H-7 $\rightarrow$ L    | 0.3210       |                |        | H-7 $\rightarrow$ L    | 0.4281       |
| 15 | 280.1          | 0.0015 | H-6 $\rightarrow$ L+1  | 0.5193       | 266.5          | 0.0000 | H-6 $\rightarrow$ L+1  | 0.4221       |
|    |                |        | H-7 $\rightarrow$ L    | 0.5821       |                |        | H-11 $\rightarrow$ L   | 0.4760       |
| 16 | 278.6          | 0.0824 | H-6 $\rightarrow$ L+1  | 0.3796       | 266.5          | 0.0000 | H-10 $\rightarrow$ L+1 | 0.4685       |
|    |                |        | H-7 $\rightarrow$ L+1  | 0.8907       |                |        | H-11 $\rightarrow$ L+1 | 0.4602       |
| 17 | 271.8          | 0.0000 | H-7 $\rightarrow$ L+1  | 0.8907       | 263.7          | 0.0000 | H-10 $\rightarrow$ L   | 0.4838       |
|    |                |        | H-11 $\rightarrow$ L   | 0.4905       |                |        | H-7 $\rightarrow$ L    | 0.4630       |
| 18 | 271.8          | 0.0001 | H-10 $\rightarrow$ L+1 | 0.4779       | 263.5          | 0.0034 | H-6 $\rightarrow$ L+1  | 0.4768       |
|    |                |        | H-11 $\rightarrow$ L+1 | 0.4677       |                |        | H-7 $\rightarrow$ L+1  | 0.5756       |
| 19 | 271.2          | 0.0001 | H-10 $\rightarrow$ L   | 0.5001       | 255.7          | 0.0004 | H-6 $\rightarrow$ L    | 0.3397       |
|    |                |        | H-8 $\rightarrow$ L    | 0.9371       |                |        | H-8 $\rightarrow$ L    | 0.9154       |
| 20 | 269.6          | 0.0004 | H-8 $\rightarrow$ L+1  | 0.9404       | 254.1          | 0.0000 | H-8 $\rightarrow$ L+1  | 0.9263       |

Table S3. Calculated properties of the first singlet excited states  $S_0 \rightarrow S_n$  of  $[\text{ZnL}_2\text{Br}_2]$  (**1**) at wb97XD/def2-TZVPP and CAM-B3LYP/def2-TZVPP level: transition wavelength ( $\lambda$ ), oscillator strength (f). H is for HOMO, L is for LUMO abbreviation. The contribution of the individual excitations is listed if larger than 0.1

| n  | wb97XD         |        |                        |              | CAM-B3LYP      |        |                        |              |
|----|----------------|--------|------------------------|--------------|----------------|--------|------------------------|--------------|
|    | $\lambda$ , nm | f      | electronic states      | contribution | $\lambda$ , nm | f      | electronic states      | contribution |
| 1  | 314.7          | 0.1859 | H-1 $\rightarrow$ L+1  | 0.4174       | 334.9          | 0.1550 | H-1 $\rightarrow$ L+1  | 0.3992       |
|    |                |        | H $\rightarrow$ L      | 0.5372       |                |        | H $\rightarrow$ L      | 0.5636       |
| 2  | 311.8          | 0.0165 | H-1 $\rightarrow$ L    | 0.4407       | 332            | 0.0150 | H-1 $\rightarrow$ L    | 0.4305       |
|    |                |        | H $\rightarrow$ L+1    | 0.5131       |                |        | H $\rightarrow$ L+1    | 0.5313       |
| 3  | 270.2          | 0.2493 | H-7 $\rightarrow$ L+1  | 0.2113       | 276.5          | 0.2167 | H-7 $\rightarrow$ L+1  | 0.1820       |
|    |                |        | H-6 $\rightarrow$ L    | 0.2140       |                |        | H-6 $\rightarrow$ L    | 0.3198       |
|    |                |        | H-4 $\rightarrow$ L    | 0.2091       |                |        | H-3 $\rightarrow$ L+1  | 0.2647       |
|    |                |        | H-2 $\rightarrow$ L+1  | 0.2144       |                |        |                        |              |
| 4  | 270            | 0.1470 | H-7 $\rightarrow$ L    | 0.2144       | 276.5          | 0.1157 | H-7 $\rightarrow$ L    | 0.1817       |
|    |                |        | H-6 $\rightarrow$ L+1  | 0.2114       |                |        | H-6 $\rightarrow$ L+1  | 0.3050       |
|    |                |        | H-4 $\rightarrow$ L+1  | 0.2022       |                |        | H-3 $\rightarrow$ L    | 0.2899       |
|    |                |        | H-2 $\rightarrow$ L    | 0.2215       |                |        |                        |              |
| 5  | 250.2          | 0.0003 | H-11 $\rightarrow$ L   | 0.2785       | 262.6          | 0.0181 | H-11 $\rightarrow$ L+1 | 0.1170       |
|    |                |        | H-11 $\rightarrow$ L+1 | 0.1621       |                |        | H-10 $\rightarrow$ L   | 0.1212       |
|    |                |        | H-10 $\rightarrow$ L   | 0.1710       |                |        | H-7 $\rightarrow$ L+1  | 0.1087       |
|    |                |        | H-10 $\rightarrow$ L+1 | 0.2913       |                |        | H-2 $\rightarrow$ L    | 0.3492       |
| 6  | 250.2          | 0.0003 | H-11 $\rightarrow$ L   | 0.1696       | 262.3          | 0.0153 | H-11 $\rightarrow$ L   | 0.1329       |
|    |                |        | H-11 $\rightarrow$ L+1 | 0.2883       |                |        | H-10 $\rightarrow$ L+1 | 0.1379       |
|    |                |        | H-10 $\rightarrow$ L   | 0.2817       |                |        | H-7 $\rightarrow$ L    | 0.1270       |
|    |                |        | H-10 $\rightarrow$ L+1 | 0.1633       |                |        | H-5 $\rightarrow$ L    | 0.1005       |
| 7  | 224.5          | 0.0010 | H-7 $\rightarrow$ L+1  | 0.1530       | 256.7          | 0.0008 | H-11 $\rightarrow$ L+1 | 0.3273       |
|    |                |        | H-3 $\rightarrow$ L    | 0.4089       |                |        | H-10 $\rightarrow$ L   | 0.3293       |
|    |                |        | H-2 $\rightarrow$ L+1  | 0.1777       |                |        | H-2 $\rightarrow$ L    | 0.2203       |
|    |                |        |                        |              |                |        |                        |              |
| 8  | 224.4          | 0.0017 | H-7 $\rightarrow$ L    | 0.1947       | 256.5          | 0.0034 | H-11 $\rightarrow$ L   | 0.2956       |
|    |                |        | H-6 $\rightarrow$ L+1  | 0.1102       |                |        | H-10 $\rightarrow$ L+1 | 0.2972       |
|    |                |        | H-3 $\rightarrow$ L+1  | 0.2900       |                |        | H-3 $\rightarrow$ L    | 0.1119       |
|    |                |        | H-2 $\rightarrow$ L    | 0.2468       |                |        |                        |              |
| 9  | 220.1          | 0.0008 | H-14 $\rightarrow$ L   | 0.1416       | 256.1          | 0.0001 | H-5 $\rightarrow$ L    | 0.2451       |
|    |                |        | H-13 $\rightarrow$ L+1 | 0.1574       |                |        | H-4 $\rightarrow$ L+1  | 0.2243       |
|    |                |        | H-6 $\rightarrow$ L    | 0.1407       |                |        | H-3 $\rightarrow$ L    | 0.1856       |
|    |                |        | H-5 $\rightarrow$ L+1  | 0.1243       |                |        |                        |              |
| 10 | 219.8          | 0.0020 | H-4 $\rightarrow$ L    | 0.1768       | 255.7          | 0.0082 |                        |              |
|    |                |        | H-14 $\rightarrow$ L+1 | 0.1107       |                |        | H-5 $\rightarrow$ L+1  | 0.1517       |
|    |                |        | H-13 $\rightarrow$ L   | 0.1245       |                |        | H-4 $\rightarrow$ L    | 0.3452       |
|    |                |        | H-6 $\rightarrow$ L+1  | 0.1061       |                |        | H-3 $\rightarrow$ L+1  | 0.2574       |
| 11 | 219.4          | 0.0000 | H-5 $\rightarrow$ L    | 0.2281       | 246.6          | 0.0040 |                        |              |
|    |                |        | H-4 $\rightarrow$ L+1  | 0.1394       |                |        | H-2 $\rightarrow$ L    | 0.2361       |
|    |                |        | H-3 $\rightarrow$ L+1  | 0.1143       |                |        | H-1 $\rightarrow$ L+1  | 0.4045       |
|    |                |        | H-14 $\rightarrow$ L+1 | 0.2843       |                |        | H $\rightarrow$ L      | 0.2637       |
| 12 | 219.1          | 0.0012 | H-13 $\rightarrow$ L   | 0.2963       | 246.3          | 0.0000 | H-2 $\rightarrow$ L+1  | 0.3477       |
|    |                |        | H-5 $\rightarrow$ L    | 0.1997       |                |        | H-1 $\rightarrow$ L    | 0.3260       |
|    |                |        | H-14 $\rightarrow$ L   | 0.2546       |                |        | H $\rightarrow$ L+1    | 0.2540       |
|    |                |        | H-13 $\rightarrow$ L+1 | 0.2609       |                |        |                        |              |
| 13 | 206.1          | 0.0002 | H-5 $\rightarrow$ L+1  | 0.1967       | 234.3          | 0.0104 |                        |              |
|    |                |        | H-3 $\rightarrow$ L    | 0.1019       |                |        | H-4 $\rightarrow$ L    | 0.4999       |
|    |                |        | H-3 $\rightarrow$ L+1  | 0.3482       |                |        | H-3 $\rightarrow$ L+1  | 0.2990       |
|    |                |        | H-1 $\rightarrow$ L    | 0.2073       |                |        |                        |              |
| 14 | 205.8          | 0.0084 | H $\rightarrow$ L+1    | 0.1383       | 234            | 0.0002 |                        |              |
|    |                |        | H-5 $\rightarrow$ L+1  | 0.1234       |                |        | H-4 $\rightarrow$ L+1  | 0.5805       |
|    |                |        | H-3 $\rightarrow$ L    | 0.2433       |                |        | H-3 $\rightarrow$ L    | 0.2113       |
|    |                |        | H-1 $\rightarrow$ L+1  | 0.2876       |                |        |                        |              |
| 15 | 201.3          | 0.2478 | H $\rightarrow$ L      | 0.1682       | 232.1          | 0.0016 |                        |              |
|    |                |        | H-12 $\rightarrow$ L   | 0.1245       |                |        | H-5 $\rightarrow$ L    | 0.4352       |
|    |                |        | H-1 $\rightarrow$ L+3  | 0.1279       |                |        | H-2 $\rightarrow$ L+1  | 0.1346       |
|    |                |        | H $\rightarrow$ L+4    | 0.1244       |                |        | H $\rightarrow$ L+1    | 0.1327       |
| 16 | 200.8          | 0.1771 | H-1 $\rightarrow$ L+4  | 0.1806       | 231.4          | 0.0030 | H-5 $\rightarrow$ L+1  | 0.4933       |
|    |                |        | H $\rightarrow$ L+3    | 0.3278       |                |        | H-2 $\rightarrow$ L    | 0.1034       |
|    |                |        |                        |              |                |        | H $\rightarrow$ L      | 0.1162       |
|    |                |        |                        |              |                |        |                        |              |
| 17 | 199.9          | 0.2449 | H-1 $\rightarrow$ L+3  | 0.1926       | 224            | 0.0030 | H-14 $\rightarrow$ L   | 0.3963       |
|    |                |        | H $\rightarrow$ L+2    | 0.1565       |                |        | H-13 $\rightarrow$ L+1 | 0.3940       |
|    |                |        | H $\rightarrow$ L+4    | 0.1443       |                |        |                        |              |

|    |       |        |          |        |       |        |          |        |
|----|-------|--------|----------|--------|-------|--------|----------|--------|
| 18 | 199.1 | 0.0385 | H-12→L+1 | 0.1187 | 224   | 0.0008 | H-14→L+1 | 0.3935 |
|    |       |        | H-4→L+1  | 0.1548 |       |        | H-13→L   | 0.3996 |
| 19 | 196.6 | 0.0007 | H-7→L+1  | 0.1319 | 212.7 | 0.0026 | H-8→L    | 0.8221 |
|    |       |        | H-6→L    | 0.1114 |       |        |          |        |
|    |       |        | H-4→L    | 0.2140 |       |        |          |        |
|    |       |        | H-2→L+1  | 0.2753 |       |        |          |        |
| 20 | 196.5 | 0.0013 | H-6→L+1  | 0.1159 | 211.5 | 0.0038 | H-8→L+1  | 0.7869 |
|    |       |        | H-4→L+1  | 0.1945 |       |        |          |        |
|    |       |        | H-2→L    | 0.2014 |       |        |          |        |

Table S4. Calculated properties of the first singlet excited states  $S_0 \rightarrow S_n$  of  $[\text{ZnL}_2\text{Cl}_2]$  at B3LYP/def2-TZVPP level: transition wavelength ( $\lambda$ ), oscillator strength (f). H is for HOMO, L is for LUMO abbreviation. The contribution of the individual excitations is listed if larger than 0.1

| n  | $\lambda$ , nm | f      | electronic states | contribution |
|----|----------------|--------|-------------------|--------------|
| 1  | 378.7          | 0.1035 | H-1→L+1           | 0.1327       |
|    |                |        | H→L               | 0.8484       |
| 2  | 374.2          | 0.0129 | H-1→L             | 0.1848       |
|    |                |        | H→L+1             | 0.7917       |
| 3  | 356.2          | 0.0009 | H-1→L             | 0.7972       |
|    |                |        | H→L+1             | 0.1936       |
| 4  | 354.2          | 0.0029 | H-1→L+1           | 0.8506       |
|    |                |        | H→L               | 0.1391       |
| 5  | 308.9          | 0.0026 | H-3→L             | 0.7981       |
|    |                |        | H-2→L+1           | 0.1233       |
|    |                |        | H-7→L             | 0.1006       |
| 6  | 307.9          | 0.0023 | H-3→L+1           | 0.4314       |
|    |                |        | H-2→L             | 0.4180       |
|    |                |        | H-5→L             | 0.2113       |
| 7  | 303.8          | 0.0036 | H-3→L+1           | 0.4188       |
|    |                |        | H-2→L             | 0.2767       |
|    |                |        | H-6→L             | 0.1769       |
| 8  | 303.3          | 0.0112 | H-5→L+1           | 0.1320       |
|    |                |        | H-3→L             | 0.1164       |
|    |                |        | H-2→L+1           | 0.5023       |
| 9  | 294.7          | 0.0000 | H-5→L             | 0.6665       |
|    |                |        | H-3→L+1           | 0.1370       |
|    |                |        | H-6→L             | 0.2805       |
| 10 | 293.4          | 0.0102 | H-5→L+1           | 0.3886       |
|    |                |        | H-2→L+1           | 0.1950       |
|    |                |        | H-6→L             | 0.4731       |
| 11 | 291.3          | 0.0032 | H-5→L+1           | 0.4199       |
|    |                |        | H-6→L+1           | 0.7943       |
| 12 | 290.3          | 0.0015 | H-6→L+1           | 0.7943       |
| 13 | 281.7          | 0.1365 | H-4→L             | 0.8500       |
|    |                |        | H-7→L             | 0.1421       |
| 14 | 279.9          | 0.0957 | H-4→L+1           | 0.6768       |
|    |                |        | H-7→L             | 0.6256       |
| 15 | 278.6          | 0.0076 | H-4→L+1           | 0.2016       |
|    |                |        | H-7→L+1           | 0.7611       |
| 16 | 277.1          | 0.0571 | H-2→L+1           | 0.1076       |
|    |                |        | 98a→L             | 0.4796       |
| 17 | 271.4          | 0.0002 | 99a→L+1           | 0.4750       |
|    |                |        | 98a→L+1           | 0.4537       |
| 18 | 271.3          | 0.0006 | 99a→L             | 0.4957       |
|    |                |        | H-8→L             | 0.9597       |
| 19 | 247.3          | 0.0011 | H-8→L             | 0.9597       |
| 20 | 245.9          | 0.0004 | H-8→L+1           | 0.9396       |

Table S5. Calculated properties of the first singlet excited states  $S_0 \rightarrow S_n$  of  $[ZnL_2I_2]$  (**3**) at B3LYP/def2-TZVPP and PBE0/def2-TZVPP level: transition wavelength ( $\lambda$ ), oscillator strength (f). H is for HOMO, L is for LUMO abbreviation. The contribution of the individual excitations is listed if larger than 0.1.

| n  | B3LYP          |        |                               |                            | PBE0           |        |                                       |                            |
|----|----------------|--------|-------------------------------|----------------------------|----------------|--------|---------------------------------------|----------------------------|
|    | $\lambda$ , nm | f      | electronic states             | contribution               | $\lambda$ , nm | f      | electronic states                     | contribution               |
| 1  | 511.0          | 0.0205 | H→L                           | 0.8818                     | 488.1          | 0.0266 | H → L                                 | 0.9814                     |
| 2  | 499.3          | 0.0022 | H-1→L                         | 0.8540                     | 452.2          | 0.0021 | H-1 → L<br>H → L+1                    | 0.6934<br>0.2137           |
| 3  | 481.9          | 0.0002 | H-2→L                         | 0.8345                     | 449.3          | 0.0193 | H-1 → L<br>H → L+1                    | 0.1890<br>0.7710           |
| 4  | 476.0          | 0.0206 | H→L+1<br>H-1→L+1              | 0.8061<br>0.1061           | 437.2          | 0.0021 | H-2 → L                               | 0.7993                     |
| 5  | 469.6          | 0.0054 | H-3→L                         | 0.8271                     | 426.4          | 0.0033 | H-3 → L<br>H-2 → L                    | 0.7730<br>0.1087           |
| 6  | 455.1          | 0.0014 | H-4→L                         | 0.9053                     | 414.3          | 0.0023 | H-4 → L                               | 0.8552                     |
| 7  | 446.6          | 0.0007 | H-1→L+1<br>H→L+1              | 0.8659<br>0.1090           | 403.9          | 0.0005 | H-1 → L+1                             | 0.9414                     |
| 8  | 430.7          | 0.0015 | H-2→L+1                       | 0.9573                     | 393.6          | 0.0051 | H-5 → L<br>H-2 → L+1                  | 0.6102<br>0.3003           |
| 9  | 423.5          | 0.0057 | H-3→L+1                       | 0.9708                     | 388.9          | 0.0058 | H-5 → L<br>H-2 → L+1                  | 0.3277<br>0.6080           |
| 10 | 417.4          | 0.0059 | H-5→L<br>H-4→L+1              | 0.7558<br>0.2271           | 384.8          | 0.0123 | H-3 → L+1                             | 0.8929                     |
| 11 | 415.4          | 0.0127 | H-4→L+1<br>H-5→L              | 0.2222<br>0.7570           | 381.0          | 0.0181 | H-4 → L+1                             | 0.8573                     |
| 12 | 381.6          | 0.0279 | H-5→L+1                       | 0.9611                     | 361.9          | 0.0168 | H-5 → L+1                             | 0.8988                     |
| 13 | 362.5          | 0.0034 | H-6→L                         | 0.9718                     | 335.7          | 0.0042 | H-6 → L                               | 0.9682                     |
| 14 | 333.9          | 0.0029 | H-6→L+1                       | 0.9744                     | 308.6          | 0.0036 | H-6 → L+1                             | 0.9581                     |
| 15 | 316.2          | 0.0040 | H-7→L                         | 0.9000                     | 303.1          | 0.0068 | H-7 → L                               | 0.9325                     |
| 16 | 306.9          | 0.0083 | H-9→L<br>H-8→L                | 0.3408<br>0.5705           | 291.9          | 0.0358 | H-8 → L<br>H-8 → L+1                  | 0.6959<br>0.1102           |
| 17 | 302.2          | 0.0138 | H-9→L<br>H-8→L+1              | 0.3800<br>0.3944           | 287.9          | 0.0042 | H-9 → L<br>H-8 → L+1                  | 0.7626<br>0.1510           |
| 18 | 288.2          | 0.0630 | H-8→L+1<br>H-9→L<br>H-8→L     | 0.3890<br>0.1908<br>0.1914 | 280.5          | 0.0675 | H-8 → L<br>H-8 → L+1<br>H-7 → L+1     | 0.1583<br>0.3541<br>0.1907 |
| 19 | 283.7          | 0.0536 | H-7→L+1<br>H-9→L+1<br>H-8→L+1 | 0.4870<br>0.1972<br>0.1500 | 277.2          | 0.0746 | H-8 → L+1<br>H-7 → L+1                | 0.2828<br>0.5585           |
| 20 | 281.7          | 0.0386 | H-9→L+1<br>H-7→L+1            | 0.6898<br>0.1990           | 268.8          | 0.0012 | H-11 → L+1<br>H-10 → L+1<br>H-9 → L+1 | 0.2568<br>0.2333<br>0.2847 |



Table S6. Calculated properties of the first singlet excited states  $S_0 \rightarrow S_n$  of  $[\text{ZnL}_2\text{I}_2]$  (**3**) at wB97XD/def2-TZVPP and CAM-B3LYP/def2-TZVPP level: transition wavelength ( $\lambda$ ), oscillator strength (f). H is for HOMO, L is for LUMO abbreviation. The contribution of the individual excitations is listed if larger than 0.1

| n  | wB97XD         |        |                        |              | CAM-B3LYP      |        |                        |              |
|----|----------------|--------|------------------------|--------------|----------------|--------|------------------------|--------------|
|    | $\lambda$ , nm | f      | electronic states      | contribution | $\lambda$ , nm | f      | electronic states      | contribution |
| 1  | 400.3          | 0.0609 | H $\rightarrow$ L      | 0.8764       | 434.9          | 0.0472 | H $\rightarrow$ L      | 0.9001       |
| 2  | 326.5          | 0.0542 | H-5 $\rightarrow$ L    | 0.1495       | 361.9          | 0.0124 | H $\rightarrow$ L+1    | 0.8766       |
|    |                |        | H-5 $\rightarrow$ L+1  | 0.3289       |                |        |                        |              |
|    |                |        | H-4 $\rightarrow$ L+1  | 0.1633       |                |        |                        |              |
| 3  | 309.1          | 0.0149 | H $\rightarrow$ L+1    | 0.8698       | 350.2          | 0.0425 | H-5 $\rightarrow$ L    | 0.2502       |
| 4  | 287.3          | 0.0592 | H-8 $\rightarrow$ L    | 0.1289       | 344.8          | 0.0065 | H-5 $\rightarrow$ L+1  | 0.3555       |
|    |                |        | H-4 $\rightarrow$ L    | 0.1113       |                |        | H-3 $\rightarrow$ L    | 0.2480       |
|    |                |        | H-3 $\rightarrow$ L    | 0.2206       |                |        | H-1 $\rightarrow$ L    | 0.5547       |
|    |                |        | H-1 $\rightarrow$ L    | 0.2615       |                |        |                        |              |
| 5  | 279.5          | 0.0471 | H-8 $\rightarrow$ L    | 0.1406       | 332.3          | 0.0021 | H-2 $\rightarrow$ L    | 0.5761       |
|    |                |        | H-5 $\rightarrow$ L    | 0.1870       |                |        | H-1 $\rightarrow$ L    | 0.1421       |
|    |                |        | H-1 $\rightarrow$ L    | 0.1351       |                |        |                        |              |
| 6  | 274.9          | 0.0291 | H-2 $\rightarrow$ L    | 0.4646       | 321.5          | 0.0013 | H-3 $\rightarrow$ L    | 0.5586       |
|    |                |        | H-1 $\rightarrow$ L    | 0.1060       |                |        | H-2 $\rightarrow$ L    | 0.1344       |
| 7  | 271.4          | 0.1239 | H-7 $\rightarrow$ L    | 0.1179       | 313.9          | 0.0265 | H-1 $\rightarrow$ L    | 0.2149       |
|    |                |        | H-7 $\rightarrow$ L+1  | 0.3890       |                |        | H-5 $\rightarrow$ L    | 0.3095       |
|    |                |        |                        |              |                |        | H-5 $\rightarrow$ L+1  | 0.2043       |
| 8  | 264.3          | 0.0110 | H-3 $\rightarrow$ L    | 0.2466       | 305.3          | 0.0164 | H-4 $\rightarrow$ L    | 0.2872       |
|    |                |        | H-1 $\rightarrow$ L    | 0.3767       |                |        | H-5 $\rightarrow$ L    | 0.3141       |
|    |                |        |                        |              |                |        | H-4 $\rightarrow$ L    | 0.4327       |
| 9  | 258            | 0.0088 | H-8 $\rightarrow$ L    | 0.1489       | 296.9          | 0.0125 | H-3 $\rightarrow$ L+1  | 0.1072       |
|    |                |        | H-5 $\rightarrow$ L    | 0.1531       |                |        | H-1 $\rightarrow$ L+1  | 0.7750       |
|    |                |        | H-4 $\rightarrow$ L    | 0.2935       |                |        |                        |              |
|    |                |        | H-2 $\rightarrow$ L    | 0.1640       |                |        |                        |              |
| 10 | 251.7          | 0.0003 | H-11 $\rightarrow$ L   | 0.1319       | 288.2          | 0.0243 | H-3 $\rightarrow$ L+1  | 0.6381       |
|    |                |        | H-11 $\rightarrow$ L+1 | 0.5788       |                |        |                        |              |
|    |                |        | H-10 $\rightarrow$ L+1 | 0.1412       |                |        |                        |              |
| 11 | 248.1          | 0.0039 | H-5 $\rightarrow$ L    | 0.3107       | 287.1          | 0.0016 | H-4 $\rightarrow$ L+1  | 0.2192       |
|    |                |        | H-4 $\rightarrow$ L    | 0.2418       |                |        | H-2 $\rightarrow$ L+1  | 0.6668       |
|    |                |        | H-3 $\rightarrow$ L    | 0.1997       |                |        |                        |              |
| 12 | 242.4          | 0.0017 | H-14 $\rightarrow$ L   | 0.1536       | 280.6          | 0.0525 | H-8 $\rightarrow$ L    | 0.3021       |
|    |                |        | H-13 $\rightarrow$ L   | 0.2542       |                |        | H-7 $\rightarrow$ L    | 0.1190       |
|    |                |        | H-12 $\rightarrow$ L   | 0.1041       |                |        | H-6 $\rightarrow$ L    | 0.1895       |
| 13 | 240.1          | 0.0075 | H-3 $\rightarrow$ L+1  | 0.1814       | 279.4          | 0.0280 | H-8 $\rightarrow$ L    | 0.1019       |
|    |                |        | H-1 $\rightarrow$ L+1  | 0.6374       |                |        | H-5 $\rightarrow$ L+1  | 0.1681       |
|    |                |        |                        |              |                |        | H-4 $\rightarrow$ L+1  | 0.3650       |
|    |                |        |                        |              |                |        | H-2 $\rightarrow$ L+1  | 0.1058       |
| 14 | 234.8          | 0.0057 | H-5 $\rightarrow$ L+1  | 0.1120       | 274.9          | 0.0660 | H-7 $\rightarrow$ L    | 0.2752       |
|    |                |        | H-3 $\rightarrow$ L+1  | 0.4589       |                |        | H-7 $\rightarrow$ L+1  | 0.2895       |
|    |                |        | H-1 $\rightarrow$ L+1  | 0.1603       |                |        | H-6 $\rightarrow$ L    | 0.1599       |
| 15 | 233.4          | 0.0021 | H-4 $\rightarrow$ L+1  | 0.4182       | 270.6          | 0.0297 | H-8 $\rightarrow$ L    | 0.2174       |
|    |                |        | H-2 $\rightarrow$ L+1  | 0.3532       |                |        | H-7 $\rightarrow$ L+1  | 0.1190       |
| 16 | 230.7          | 0.0080 | H-6 $\rightarrow$ L    | 0.5273       | 260.7          | 0.0002 | H-6 $\rightarrow$ L    | 0.4754       |
|    |                |        | H-2 $\rightarrow$ L+1  | 0.1145       |                |        | H-11 $\rightarrow$ L   | 0.1341       |
|    |                |        |                        |              |                |        | H-11 $\rightarrow$ L+1 | 0.5264       |
| 17 | 227.7          | 0.0006 | H-5 $\rightarrow$ L+1  | 0.1752       | 256.1          | 0.0072 | H-10 $\rightarrow$ L+1 | 0.1390       |
|    |                |        | H-4 $\rightarrow$ L+1  | 0.2073       |                |        | H-7 $\rightarrow$ L    | 0.4187       |
|    |                |        | H-3 $\rightarrow$ L+1  | 0.1139       |                |        | H-7 $\rightarrow$ L+1  | 0.2639       |
|    |                |        | H-2 $\rightarrow$ L+1  | 0.1889       |                |        |                        |              |
| 18 | 226.5          | 0.0083 | H-7 $\rightarrow$ L    | 0.5029       | 250.2          | 0.0004 | H-13 $\rightarrow$ L   | 0.2128       |
|    |                |        | H-7 $\rightarrow$ L+1  | 0.1515       |                |        | H-12 $\rightarrow$ L   | 0.1251       |
|    |                |        |                        |              |                |        | H-9 $\rightarrow$ L    | 0.2805       |
| 19 | 223.3          | 0.1914 | H-8 $\rightarrow$ L    | 0.1601       | 247.8          | 0.0022 | H-7 $\rightarrow$ L    | 0.1208       |
|    |                |        | H $\rightarrow$ L+2    | 0.3644       |                |        | H-8 $\rightarrow$ L+1  | 0.2501       |
|    |                |        | H $\rightarrow$ L+4    | 0.1275       |                |        | H-6 $\rightarrow$ L+1  | 0.4740       |
| 20 | 221.6          | 0.0937 | H-14 $\rightarrow$ L+1 | 0.1388       | 241.9          | 0.0008 | H-8 $\rightarrow$ L+1  | 0.4385       |
|    |                |        | H-8 $\rightarrow$ L+1  | 0.2212       |                |        | H-6 $\rightarrow$ L+1  | 0.3836       |
|    |                |        | H $\rightarrow$ L+2    | 0.1313       |                |        |                        |              |

Table S7. Calculated properties of the first singlet excited states  $S_0 \rightarrow S_n$  of  $[Zn_3L_2(NH_3)_2I_6]$  at B3LYP/def2-TZVPP and PBE0/def2-TZVPP level: transition wavelength ( $\lambda$ ), oscillator strength (f). H is for HOMO, L is for LUMO abbreviation.

| n  | B3LYP          |        |                   |              | PBE0           |        |                   |              |         |        |
|----|----------------|--------|-------------------|--------------|----------------|--------|-------------------|--------------|---------|--------|
|    | $\lambda$ , nm | f      | electronic states | contribution | $\lambda$ , nm | f      | electronic states | contribution |         |        |
| 1  | 688.9          | 0.0001 | H→L               | 0.9511       | 590.9          | 0.0002 | H→L               | 0.8663       |         |        |
|    |                |        |                   |              |                |        | H→L+1             | 0.1108       |         |        |
| 2  | 657.4          | 0.0001 | H-1→L             | 0.9596       | 565.4          | 0.0002 | H-1→L             | 0.8656       |         |        |
| 3  | 641.7          | 0.0012 | H→L+1             | 0.8427       | 560.9          | 0.0014 | H→L               | 0.1257       |         |        |
|    |                |        |                   |              |                |        | H→L+1             | 0.7218       |         |        |
| 4  | 632.7          | 0.0013 | H-2→L             | 0.8815       | 548.7          | 0.0023 | H-2→L             | 0.8174       |         |        |
|    |                |        |                   |              |                |        | H-3→L             | 0.3648       |         |        |
| 5  | 614.6          | 0.0025 | H-3→L             | 0.7398       | 537.8          | 0.0034 | H-3→L+1           | 0.1160       |         |        |
|    |                |        | H-1→L+1           | 0.1772       |                |        | H-1→L+1           | 0.4296       |         |        |
|    |                |        |                   |              |                |        | H-3→L             | 0.5109       |         |        |
| 6  | 609.7          | 0.0005 | H-3→L             | 0.2096       | 532.1          | 0.0009 | H-1→L+1           | 0.4387       |         |        |
|    |                |        | H-1→L+1           | 0.7621       |                |        | H-2→L             | 0.1193       |         |        |
| 7  | 593.6          | 0.0038 | H-2→L+1           | 0.9140       | 522.7          | 0.0044 | H-2→L+1           | 0.8213       |         |        |
|    |                |        |                   |              |                |        |                   |              |         |        |
| 8  | 574.5          | 0.0080 | H-3→L+1           | 0.9391       | 508.6          | 0.0071 | H-3→L+1           | 0.8581       |         |        |
| 9  | 542.1          | 0.0022 | H-4→L             | 0.9632       | 482.5          | 0.0016 | H-4→L             | 0.8547       |         |        |
| 10 | 534.9          | 0.0007 | H-6→L             | 0.9357       | 479.3          | 0.0019 | H-6→L             | 0.6867       |         |        |
|    |                |        |                   |              |                |        | H-5→L             | 0.2280       |         |        |
| 11 | 527.6          | 0.0015 | H-7→L             | 0.3882       | 475.3          | 0.0020 | H-7→L             | 0.4341       |         |        |
|    |                |        | H-5→L             | 0.5753       |                |        | H-5→L             | 0.3653       |         |        |
| 12 | 516.7          | 0.0009 | H-7→L             | 0.5107       | 461.7          | 0.0013 | H-8→L             | 0.1656       |         |        |
|    |                |        |                   |              |                |        | H-5→L             | 0.3909       | H-8→L+1 | 0.1045 |
|    |                |        |                   |              |                |        |                   |              | H-4→L+1 | 0.6469 |
| 13 | 511.8          | 0.0010 | H-8→L             | 0.3199       | 461.3          | 0.0007 | H-7→L             | 0.4139       |         |        |
|    |                |        |                   |              |                |        | H-4→L+1           | 0.5889       | H-6→L   | 0.1397 |
|    |                |        |                   |              |                |        |                   |              | H-5→L   | 0.3353 |
| 14 | 504.3          | 0.0069 | H-8→L             | 0.5916       | 453.5          | 0.0018 | H-11→L            | 0.8821       |         |        |
|    |                |        | H-4→L+1           | 0.3551       |                |        |                   |              |         |        |
| 15 | 500.3          | 0.0003 | H-11→L            | 0.9409       | 451.7          | 0.0059 | H-8→L             | 0.6679       |         |        |
|    |                |        |                   |              |                |        | H-4→L+1           | 0.2380       |         |        |
| 16 | 496.3          | 0.0076 | H-9→L             | 0.6765       | 448.5          | 0.0087 | H-9→L             | 0.5497       |         |        |
|    |                |        | H-5→L+1           | 0.1985       |                |        | H-5→L+1           | 0.1435       |         |        |
|    |                |        | H-12→L            | 0.1256       |                |        |                   |              |         |        |
| 17 | 490.9          | 0.0023 | H-10→L            | 0.4425       | 446.6          | 0.0053 | H-10→L            | 0.5257       |         |        |
|    |                |        | H-5→L+1           | 0.2931       |                |        | H-5→L+1           | 0.2922       |         |        |
|    |                |        | H-10→L            | 0.3249       |                |        |                   |              |         |        |
| 18 | 488.7          | 0.0044 | H-9→L             | 0.2032       | 441.9          | 0.0059 | H-9→L             | 0.2381       |         |        |
|    |                |        | H-5→L+1           | 0.3477       |                |        | H-5→L+1           | 0.4064       |         |        |
| 19 | 482.4          | 0.0009 | H-8→L+1           | 0.7543       | 438            | 0.0038 | H-9→L             | 0.1401       |         |        |
|    |                |        |                   |              |                |        | H-8→L+1           | 0.5081       |         |        |
| 20 | 470            | 0.0183 | H-13→L            | 0.1800       | 433.7          | 0.0288 | H-8→L+1           | 0.2296       |         |        |
|    |                |        | H-12→L            | 0.3700       |                |        | H-7→L+1           | 0.3417       |         |        |
|    |                |        | H-7→L+1           | 0.1074       |                |        | H-6→L+1           | 0.2202       |         |        |
|    |                |        | H-6→L+1           | 0.1802       |                |        |                   |              |         |        |

Table S8. Calculated properties of the first singlet excited states  $S_0 \rightarrow S_n$  of  $[Zn_3L_2(NH_3)_2I_6]$  at wB97XD/def2-TZVPP and CAM-B3LYP/def2-TZVPP level: transition wavelength ( $\lambda$ ), oscillator strength (f). H is for HOMO, L is for LUMO abbreviation.

| n  | wB97XD         |        |                   |              | CAM-B3LYP      |        |                   |              |
|----|----------------|--------|-------------------|--------------|----------------|--------|-------------------|--------------|
|    | $\lambda$ , nm | f      | electronic states | contribution | $\lambda$ , nm | f      | electronic states | contribution |
| 1  | 360.4          | 0.0511 | H-13→L+1          | 0.1418       | 400            | 0.0265 | H-13→L+1          | 0.1098       |
|    |                |        | H-5→L+1           | 0.3423       |                |        | H-5→L+1           | 0.1514       |
| 2  | 345.2          | 0.0707 | H-14→L            | 0.5947       | 378.9          | 0.0158 | H→L+1             | 0.2550       |
|    |                |        |                   |              |                |        | H-2→L+1           | 0.2727       |
| 3  | 308.7          | 0.0259 | H-5→L             | 0.3859       | 377.5          | 0.0310 | H-14→L            | 0.3217       |
|    |                |        |                   |              |                |        | H-5→L             | 0.1261       |
| 4  | 300            | 0.0764 | H-2→L+1           | 0.2820       | 369.6          | 0.0279 | H-14→L            | 0.1190       |
|    |                |        | H→L+1             | 0.2628       |                |        | H-5→L             | 0.1207       |
| 5  | 292.4          | 0.0033 | H-8→L+1           | 0.3671       | 367.4          | 0.0211 | H→L               | 0.1975       |
|    |                |        | H-4→L+1           | 0.2150       |                |        | H-3→L+1           | 0.3767       |
| 6  | 291.9          | 0.0154 | H-11→L            | 0.6232       | 356.2          | 0.0007 | H-1→L             | 0.1324       |
|    |                |        |                   |              |                |        | H-2→L+1           | 0.3643       |
| 7  | 287.1          | 0.0196 | H-3→L+1           | 0.3057       | 354.8          | 0.0047 | H→L               | 0.1127       |
|    |                |        | H-1→L+1           | 0.2697       |                |        | H→L+1             | 0.1270       |
| 8  | 282.2          | 0.0032 | H-7→L             | 0.1724       | 353.8          | 0.0083 | H-11→L            | 0.3071       |
|    |                |        | H-6→L             | 0.5320       |                |        | H-7→L             | 0.1278       |
| 9  | 281            | 0.0292 | H-9→L+1           | 0.1389       | 348.5          | 0.0037 | H-6→L             | 0.2745       |
|    |                |        | H-7→L+1           | 0.1271       |                |        | H-8→L+1           | 0.3309       |
| 10 | 279            | 0.0924 | H-4→L+1           | 0.1940       | 345.5          | 0.0003 | H-4→L+1           | 0.3958       |
|    |                |        | H-20→L            | 0.1353       |                |        | H-11→L            | 0.1575       |
| 11 | 274.5          | 0.0034 | H-11→L            | 0.1380       | 344.1          | 0.0013 | H-6→L             | 0.1027       |
|    |                |        | H-4→L             | 0.1147       |                |        | H-2→L             | 0.1273       |
| 12 | 273.1          | 0.0291 | H-2→L+1           | 0.2939       | 340.9          | 0.0126 | H→L               | 0.2840       |
|    |                |        | H→L+1             | 0.2856       |                |        | H→L+1             | 0.1026       |
| 13 | 271.2          | 0.0175 | H-20→L            | 0.1353       | 338.6          | 0.0142 | H-11→L            | 0.1293       |
|    |                |        | H-13→L            | 0.1120       |                |        | H-3→L+1           | 0.1534       |
| 14 | 269.7          | 0.0420 | H-11→L            | 0.1380       | 338.1          | 0.0053 | H-1→L             | 0.2122       |
|    |                |        | H-10→L            | 0.2427       |                |        | H-11→L            | 0.1596       |
| 15 | 268            | 0.0010 | H-4→L             | 0.1147       | 334.1          | 0.0022 | H-3→L+1           | 0.1753       |
|    |                |        | H-18→L+1          | 0.1018       |                |        | H-1→L+1           | 0.1766       |
| 16 | 265.4          | 0.0072 | H-8→L+1           | 0.1091       | 344.1          | 0.0013 | H→L               | 0.1339       |
|    |                |        | H-4→L+1           | 0.2157       |                |        | H-9→L+1           | 0.2155       |
| 17 | 262.5          | 0.0227 | H-2→L+1           | 0.1151       | 340.9          | 0.0126 | H-7→L+1           | 0.1416       |
|    |                |        | H-18→L+1          | 0.1736       |                |        | H-6→L+1           | 0.1272       |
| 18 | 258.6          | 0.0018 | H-8→L+1           | 0.1728       | 338.1          | 0.0053 | H-5→L+1           | 0.1006       |
|    |                |        | H-7→L+1           | 0.1258       |                |        | H-4→L+1           | 0.2332       |
| 19 | 257.2          | 0.0108 | H-12→L            | 0.2203       | 334.1          | 0.0022 | H-8→L             | 0.1003       |
|    |                |        | H-4→L             | 0.1826       |                |        | H-4→L             | 0.2205       |
| 20 | 265.4          | 0.0072 | H-3→L+1           | 0.3215       | 332.9          | 0.0017 | H-1→L             | 0.2246       |
|    |                |        | H-1→L+1           | 0.3294       |                |        | H-10→L            | 0.3879       |
| 21 | 262.5          | 0.0227 | H-4→L             | 0.3303       | 330.6          | 0.0052 | H-5→L             | 0.1002       |
|    |                |        | H-9→L             | 0.1328       |                |        | H-2→L             | 0.1651       |
| 22 | 258.6          | 0.0018 | H-7→L             | 0.2644       | 328.7          | 0.0015 | H-13→L            | 0.1580       |
|    |                |        | H→L               | 0.1459       |                |        | H-10→L            | 0.1099       |
| 23 | 257.2          | 0.0108 | H-9→L             | 0.1328       | 326.6          | 0.0050 | H-2→L             | 0.2534       |
|    |                |        | H-7→L             | 0.2644       |                |        | H-8→L+1           | 0.3817       |
| 24 | 257.2          | 0.0108 | H→L               | 0.3335       | 326.6          | 0.0050 | H-4→L+1           | 0.2518       |
|    |                |        | H-9→L             | 0.1328       |                |        | H-13→L            | 0.1580       |
| 25 | 257.2          | 0.0108 | H→L               | 0.3335       | 326.6          | 0.0050 | H-12→L            | 0.1319       |
|    |                |        | H-7→L             | 0.2644       |                |        | H-3→L             | 0.2330       |
| 26 | 257.2          | 0.0108 | H→L               | 0.3335       | 326.6          | 0.0050 | H-2→L             | 0.1480       |
|    |                |        | H-5→L             | 0.1869       |                |        | H-9→L             | 0.1366       |

|    |       |        |          |        |       |        |        |        |
|----|-------|--------|----------|--------|-------|--------|--------|--------|
| 20 | 257.1 | 0.0022 | H-14→L+1 | 0.1208 | 322.5 | 0.0016 | H-13→L | 0.1121 |
|    |       |        | H-9→L+1  | 0.4393 |       |        | H-12→L | 0.2924 |
|    |       |        | H-7→L+1  | 0.1961 |       |        | H-3→L  | 0.2608 |

Table S9. Calculated properties of the first singlet excited states  $S_0 \rightarrow S_n$  of  $[Zn_4L_3(NH_3)_2I_8]$  at B3LYP/def2-TZVPP and PBE0/def2-TZVPP level: transition wavelength ( $\lambda$ ), oscillator strength (f). H is for HOMO, L is for LUMO abbreviation.

| n  | B3LYP          |        |                   |              | PBE0           |        |                   |              |
|----|----------------|--------|-------------------|--------------|----------------|--------|-------------------|--------------|
|    | $\lambda$ , nm | f      | electronic states | contribution | $\lambda$ , nm | f      | electronic states | contribution |
| 1  | 856.5          | 0.0000 | H→L               | 0.9932       | 699.6          | 0.0000 | H→L               | 0.9805       |
| 2  | 817.2          | 0.0001 | H-1→L             | 0.9903       | 674.6          | 0.0001 | H-1→L             | 0.9700       |
| 3  | 775.5          | 0.0008 | H-2→L             | 0.8402       | 652.7          | 0.0025 | H-2→L             | 0.1484       |
|    |                |        | H→L+1             | 0.1296       |                |        | H→L+1             | 0.7042       |
| 4  | 767.6          | 0.0013 | H-2→L             | 0.1490       | 643.4          | 0.0001 | H-2→L             | 0.8168       |
|    |                |        | H→L+1             | 0.8140       |                |        | H→L+1             | 0.1643       |
| 5  | 742            | 0.0012 | H-3→L             | 0.1991       | 633.5          | 0.0017 | H-1→L+1           | 0.8315       |
|    |                |        | H-1→L+1           | 0.7375       |                |        |                   |              |
| 6  | 735.6          | 0.0001 | H-3→L             | 0.7917       | 617.4          | 0.0001 | H-3→L             | 0.9297       |
|    |                |        | H-1→L+1           | 0.1973       |                |        |                   |              |
| 7  | 709.8          | 0.0005 | H-2→L+1           | 0.8881       | 608.5          | 0.0004 | H-2→L+1           | 0.7465       |
| 8  | 678.5          | 0.0003 | H-4→L             | 0.9682       | 582.7          | 0.0003 | H-3→L+1           | 0.7717       |
| 9  | 676.1          | 0.0002 | H-3→L+1           | 0.8973       | 578.4          | 0.0005 | H-4→L             | 0.9021       |
| 10 | 650.3          | 0.0001 | H-5→L             | 0.9724       | 565.5          | 0.0008 | H-2→L+2           | 0.2715       |
|    |                |        |                   |              |                |        | H→L+2             | 0.5878       |
| 11 | 640.2          | 0.0010 | H-2→L+2           | 0.2562       | 556.5          | 0.0003 | H-5→L             | 0.9042       |
|    |                |        | H→L+2             | 0.6732       |                |        |                   |              |
| 12 | 634.1          | 0.0006 | H-4→L+1           | 0.8991       | 552.3          | 0.0007 | H-4→L+1           | 0.8811       |
| 13 | 630.9          | 0.0015 | H-7→L             | 0.1260       | 548.6          | 0.0069 | H-3→L+1           | 0.1193       |
|    |                |        | H-6→L             | 0.7912       |                |        | H-3→L+2           | 0.1637       |
|    |                |        |                   |              |                |        | H-1→L+2           | 0.6122       |
| 14 | 620            | 0.0010 | H-7→L             | 0.8059       | 547.2          | 0.0036 | H-7→L             | 0.2248       |
|    |                |        | H-6→L             | 0.1231       |                |        | H-6→L             | 0.5995       |
| 15 | 618.2          | 0.0058 | H-3→L+2           | 0.1916       | 536.6          | 0.0004 | H-7→L             | 0.5971       |
|    |                |        | H-1→L+2           | 0.7230       |                |        | H-6→L             | 0.2422       |
| 16 | 608.1          | 0.0005 | H-5→L+1           | 0.9605       | 531.5          | 0.0007 | H-5→L+1           | 0.8893       |
| 17 | 589.6          | 0.0073 | H-6→L+1           | 0.9185       | 519.3          | 0.0118 | H-6→L+1           | 0.8698       |
| 18 | 587.1          | 0.0007 | H-2→L+2           | 0.6757       | 517.9          | 0.0015 | H-2→L+2           | 0.5556       |
|    |                |        | H→L+2             | 0.2868       |                |        | H→L+2             | 0.3221       |
| 19 | 579.8          | 0.0078 | H-7→L+1           | 0.9233       | 513.9          | 0.0054 | H-7→L+1           | 0.8568       |
| 20 | 570.5          | 0.0005 | H-8→L             | 0.8787       | 511.2          | 0.0008 | H-8→L             | 0.7201       |
|    |                |        |                   |              |                |        | H-8→L+1           | 0.1520       |

Table S10. Calculated properties of the first singlet excited states  $S_0 \rightarrow S_n$  of  $[\text{Zn}_4\text{L}_3(\text{NH}_3)_2\text{I}_8]$  at wB97XD/def2-TZVPP and CAM-B3LYP/def2-TZVPP level: transition wavelength ( $\lambda$ ), oscillator strength (f). H is for HOMO, L is for LUMO abbreviation.

| n  | wB97XD         |        |                   |              | CAM-B3LYP      |        |                   |              |
|----|----------------|--------|-------------------|--------------|----------------|--------|-------------------|--------------|
|    | $\lambda$ , nm | f      | electronic states | contribution | $\lambda$ , nm | f      | electronic states | contribution |
| 1  | 383.5          | 0.0177 | H-13→L+1          | 0.1445       | 431.9          | 0.0060 | H-2→L+1           | 0.1229       |
|    |                |        | H-11→L+1          | 0.2928       |                |        | H-2→L+2           | 0.3236       |
|    |                |        | H-10→L+1          | 0.1359       |                |        | H→L+1             | 0.1413       |
| 2  | 375.9          | 0.0653 | H-8→L+1           | 0.1650       | 427.1          | 0.0148 | H→L+2             | 0.2491       |
|    |                |        | H-8→L+2           | 0.2645       |                |        | H-8→L+1           | 0.1191       |
|    |                |        | H-1→L+2           | 0.1145       |                |        | H-1→L+1           | 0.2553       |
| 3  | 351            | 0.0062 | H-2→L+1           | 0.1011       | 415.2          | 0.0304 | H-1→L+2           | 0.2289       |
|    |                |        | H-2→L+2           | 0.4356       |                |        | H-13→L+1          | 0.2037       |
|    |                |        | H→L+2             | 0.2584       |                |        | H-11→L+1          | 0.1847       |
| 4  | 348.6          | 0.0362 | H-21→L            | 0.2234       | 404.6          | 0.0011 | H-10→L+1          | 0.1115       |
|    |                |        | H-20→L            | 0.3685       |                |        | H-7→L+1           | 0.1328       |
|    |                |        |                   |              |                |        | H-8→L+1           | 0.2449       |
| 5  | 334.3          | 0.0124 | H-8→L+1           | 0.1781       | 385.6          | 0.0055 | H-3→L+1           | 0.1023       |
|    |                |        | H-3→L+2           | 0.2910       |                |        | H-3→L+2           | 0.2354       |
|    |                |        | H-1→L+2           | 0.2934       |                |        | H-1→L+2           | 0.1246       |
| 6  | 330.5          | 0.0418 | H-8→L+1           | 0.1441       | 384.5          | 0.0063 | H-11→L            | 0.1367       |
|    |                |        | H-8→L+2           | 0.2652       |                |        | H-4→L+1           | 0.1007       |
|    |                |        | H-1→L+1           | 0.1535       |                |        |                   |              |
| 7  | 320.1          | 0.0238 | H-13→L            | 0.1402       | 384            | 0.0291 | H-11→L            | 0.1039       |
|    |                |        | H-11→L            | 0.2276       |                |        | H-8→L+2           | 0.2599       |
|    |                |        | H-10→L            | 0.1893       |                |        | H-4→L+1           | 0.2084       |
| 8  | 313.8          | 0.0149 | H-6→L+1           | 0.1022       | 380.9          | 0.0002 | H-1→L+1           | 0.1236       |
|    |                |        | H-6→L+2           | 0.1935       |                |        | H-2→L+2           | 0.1001       |
|    |                |        | H-4→L+1           | 0.2107       |                |        | H→L               | 0.4597       |
| 9  | 312.1          | 0.0342 | H-4→L+2           | 0.2144       | 375.1          | 0.0006 | H→L+1             | 0.3325       |
|    |                |        | H-14→L            | 0.6509       |                |        | H-1→L             | 0.1637       |
|    |                |        |                   |              |                |        | H→L               | 0.3641       |
| 10 | 302.9          | 0.0163 | H-6→L+1           | 0.1024       | 373.6          | 0.0151 | H→L+1             | 0.3487       |
|    |                |        | H-4→L+1           | 0.3725       |                |        | H-21→L            | 0.1849       |
|    |                |        |                   |              |                |        | H-14→L            | 0.2005       |
| 11 | 298.9          | 0.0226 | H-6→L+1           | 0.1015       | 372.2          | 0.0073 | H-10→L            | 0.2412       |
|    |                |        | H-5→L+1           | 0.1802       |                |        | H-6→L+1           | 0.2836       |
|    |                |        | H-5→L+2           | 0.1682       |                |        | H-5→L+1           | 0.2384       |
| 12 | 297.4          | 0.0368 | H-15→L            | 0.2531       | 370            | 0.0005 |                   |              |
|    |                |        | H-11→L            | 0.1096       |                |        | H-1→L             | 0.6292       |
|    |                |        | H-10→L            | 0.1911       |                |        | H→L               | 0.1357       |
| 13 | 294.3          | 0.0379 | H-17→L+1          | 0.1015       | 369.3          | 0.0036 | H-6→L+1           | 0.2119       |
|    |                |        | H-5→L+1           | 0.1404       |                |        | H-5→L+1           | 0.2808       |
|    |                |        |                   |              |                |        | H-2→L+1           | 0.1294       |
| 14 | 292.8          | 0.0260 | H→L+1             | 0.1247       | 367.7          | 0.0007 | H-5→L+1           | 0.1606       |
|    |                |        |                   |              |                |        | H-2→L             | 0.1067       |
|    |                |        |                   |              |                |        | H-2→L+1           | 0.3925       |
| 15 | 292.3          | 0.0276 | H-14→L            | 0.1006       | 365.2          | 0.0338 | H→L+2             | 0.1376       |
|    |                |        | H-11→L            | 0.1541       |                |        | H-21→L            | 0.2087       |
|    |                |        | H-10→L            | 0.1720       |                |        | H-14→L            | 0.4521       |
| 16 | 290.2          | 0.0315 | H→L+1             | 0.1717       | 358.3          | 0.0038 | H-1→L+1           | 0.2774       |
| 17 | 288.7          | 0.0025 | H-6→L+1           | 0.2955       | 357.5          | 0.0015 | H-15→L            | 0.1049       |
|    |                |        | H-4→L+2           | 0.2169       |                |        | H-10→L            | 0.1859       |
|    |                |        | H-7→L+1           | 0.1630       |                |        |                   |              |
| 18 | 287.7          | 0.0013 | H-5→L+1           | 0.1081       | 356.5          | 0.0036 | H-2→L             | 0.4432       |
|    |                |        | H-4→L+2           | 0.1347       |                |        |                   |              |
|    |                |        |                   |              |                |        |                   |              |
| 19 | 285.6          | 0.0386 | H-13→L            | 0.2687       | 356            | 0.0025 | H-10→L            | 0.1101       |
|    |                |        |                   |              |                |        | H-7→L+1           | 0.1405       |
|    |                |        |                   |              |                |        | H-2→L             | 0.2069       |
| 20 | 282.7          | 0.0176 | complex           | complex      | 355.1          | 0.0005 | H-4→L+2           | 0.1185       |
|    |                |        |                   |              |                |        | H-3→L             | 0.1425       |
|    |                |        |                   |              |                |        | H-3→L+1           | 0.3630       |

Table S11. Calculated properties of the first singlet excited states  $S_0 \rightarrow S_n$  of  $[\text{ZnLI}_2]_n$  (**4**) with B3LYP functional: transition wavelength ( $\lambda$ ), oscillator strength (f). H is for HOCO, L is for LUCO crystalline orbitals abbreviation.

| n  | $\lambda$ , nm | f      | electronic states | Excitation amplitude |
|----|----------------|--------|-------------------|----------------------|
| 1  | 457.0          | 0.0169 | H→L               | 0.9924               |
|    |                |        | H-2→L+1           | 0.1001               |
| 2  | 452.2          | 0.0000 | H-1→L             | 0.9939               |
|    |                |        | H→L+2             | -0.0512              |
| 3  | 449.5          | 0.0000 | H→L+1             | 0.8893               |
|    |                |        | H-2→L             | 0.4521               |
| 4  | 445.2          | 0.0000 | H-2→L             | -0.8826              |
|    |                |        | H→L+1             | 0.4512               |
|    |                |        | H-5→L+2           | 0.0872               |
| 5  | 444.2          | 0.0079 | H-1→L+1           | -0.9880              |
|    |                |        | H-3→L             | -0.1016              |
|    |                |        | H-2→L+2           | 0.0555               |
| 6  | 438.2          | 0.0689 | H-2→L+1           | 0.9774               |
|    |                |        | H-5→L             | -0.1579              |
|    |                |        | H→L               | -0.0953              |
|    |                |        | H-4→L+1           | -0.0737              |
| 7  | 431.8          | 0.0606 | H-3→L             | -0.9694              |
|    |                |        | H-9→L+1           | -0.1497              |
|    |                |        | H-1→L+1           | 0.1074               |
|    |                |        | H→L+3             | 0.0863               |
|    |                |        | H-7→L+1           | 0.0539               |
|    |                |        | H-10→L+2          | 0.0506               |
| 8  | 426.4          | 0.0000 | H-4→L             | -0.8243              |
|    |                |        | H-5→L+1           | -0.5073              |
|    |                |        | H-1→L+3           | 0.1544               |
|    |                |        | H-6→L+1           | -0.1106              |
|    |                |        | H-12→L            | 0.859                |
|    |                |        | H-7→L+3           | 0.0724               |
|    |                |        | H-2→L             | -0.0658              |
| 9  | 426.1          | 0.0004 | H→L+1             | 0.0559               |
|    |                |        | H-5→L             | 0.8158               |
|    |                |        | H-4→L+1           | 0.4964               |
|    |                |        | H-2→L+1           | 0.1645               |
|    |                |        | H-6→L             | 0.1376               |
|    |                |        | H-12→L+1          | -0.1168              |
| 10 | 424.9          | 0.0000 | H-1→L+2           | -0.0956              |
|    |                |        | H-7→L+2           | -0.0793              |
|    |                |        | H-3→L+1           | 0.8279               |
|    |                |        | H→L+2             | -0.5025              |
|    |                |        | H-9→L             | 0.1692               |
|    |                |        | H-2→L+3           | 0.0669               |
|    |                |        | H-4→L+3           | -0.0606              |
|    |                |        | H-1→L             | -0.0582              |
|    |                |        | H-10→L+3          | -0.0550              |
|    |                |        | H-5→L+2           | -0.0526              |
|    |                |        | H-7→L             | -0.0501              |

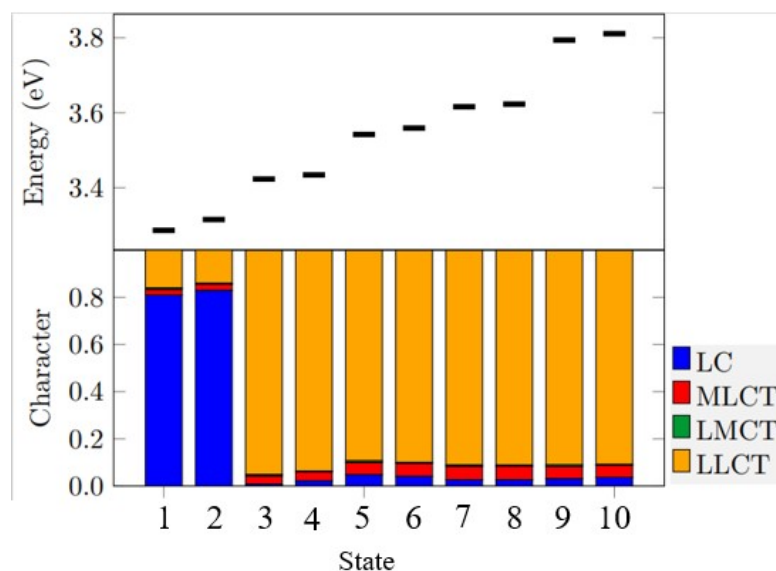

Figure S19. Decomposition of 10 vertical excitation states for  $[\text{ZnL}_2\text{Br}_2]$  (**1**) in terms of contribution from excitation types. LC – ligand-centered, MLCT – metal-to-ligand charge transfer, LMCT – ligand-to-metal charge transfer, LLCT – ligand-to-ligand charge transfer

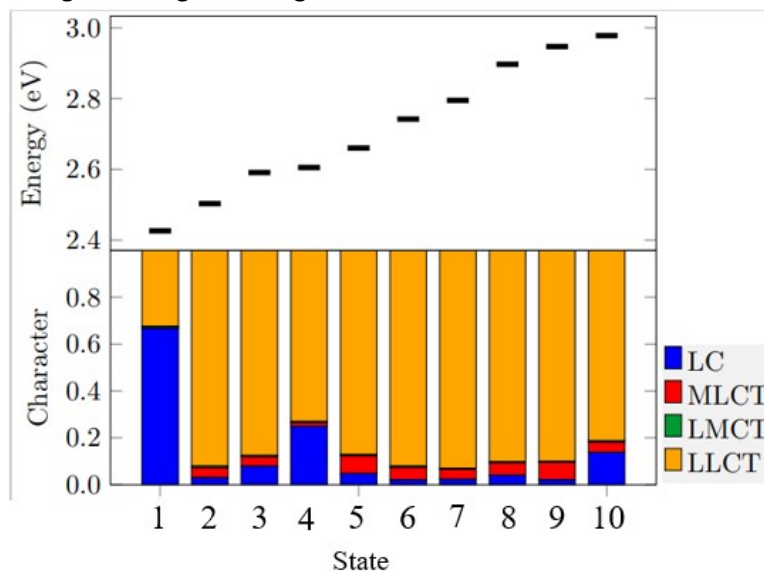

Figure S20. Decomposition of 10 vertical excitation states for  $[\text{ZnL}_2\text{I}_2]$  (**3**) in terms of contribution from excitation types. LC – ligand-centered, MLCT – metal-to-ligand charge transfer, LMCT – ligand-to-metal charge transfer, LLCT – ligand-to-ligand charge transfer

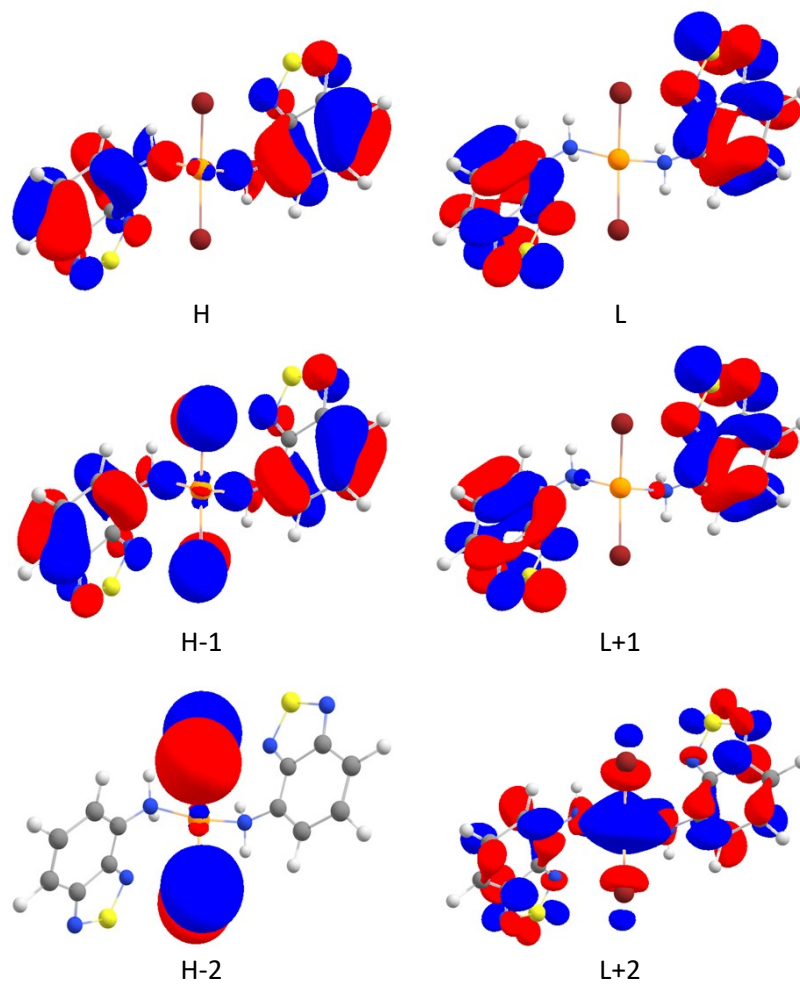

Figure S21. Frontier orbitals of  $[\text{ZnL}_2\text{Br}_2]$  (1) (B3LYP/def2-TZVPP, isovalue = 0.03 a.u.). H is for HOMO, L is for LUMO abbreviation

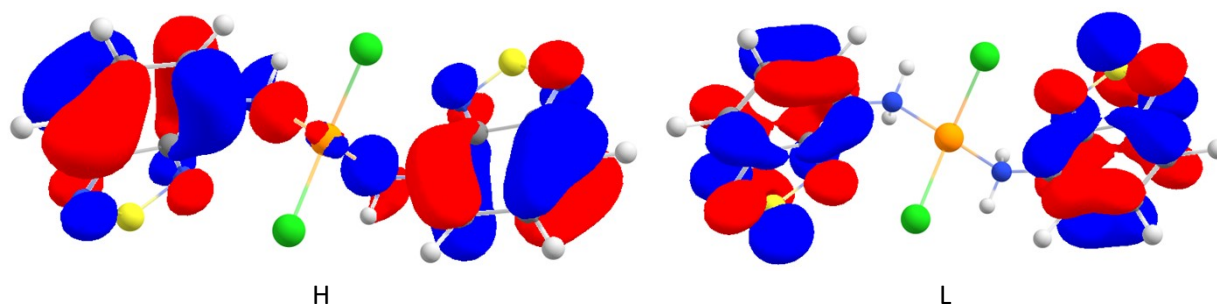

Figure S22. Frontier orbitals of  $[\text{ZnL}_2\text{Cl}_2]$  (B3LYP/def2-TZVPP, isovalue = 0.03 a.u.). H is for HOMO, L is for LUMO abbreviation



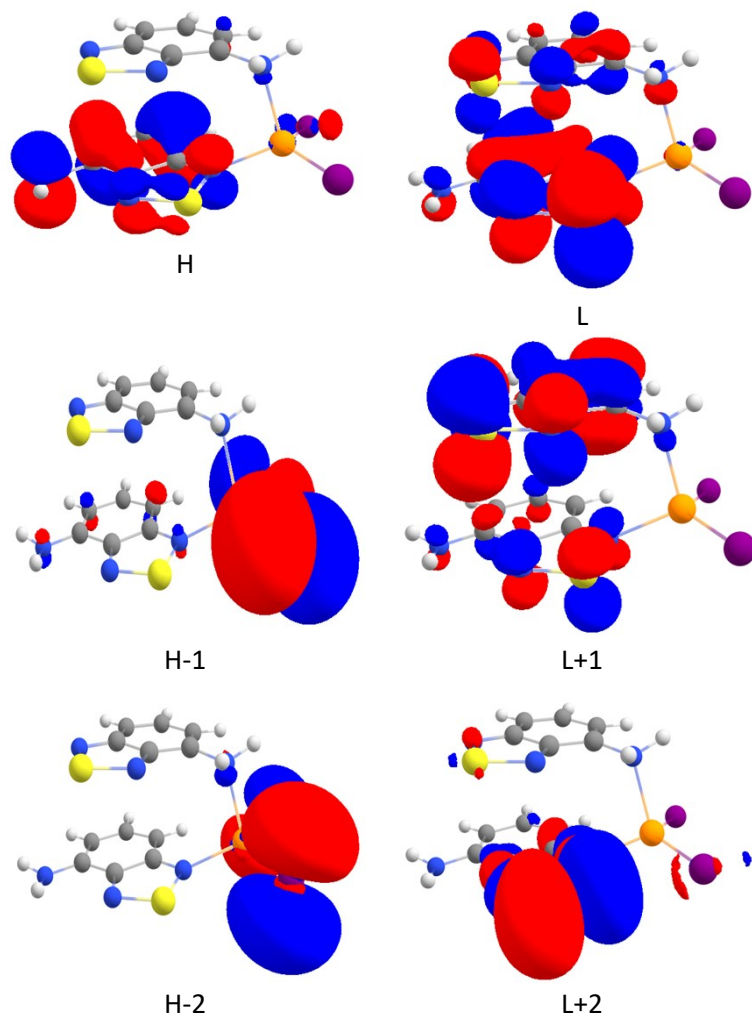

Figure S23. Frontier orbitals of [ZnL<sub>2</sub>I<sub>2</sub>] (**3**) (B3LYP/def2-TZVPP, isovalue = 0.03 a.u.). H is for HOMO, L is for LUMO abbreviation

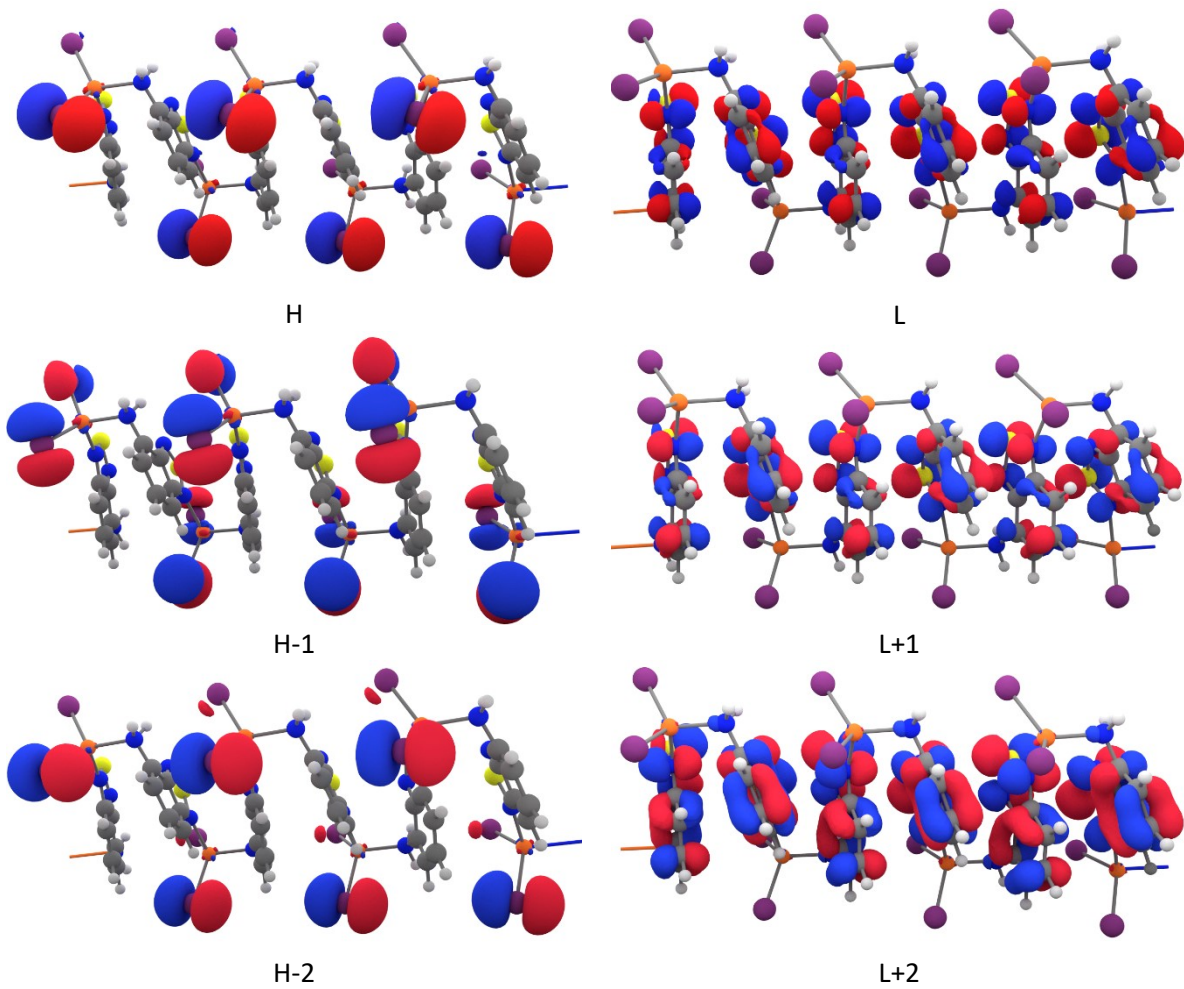

Figure S24. Frontier orbitals of  $[\text{ZnLi}_2]_n$  (**4**). isovalue = 0.03. H is for HOCO, L is for LUCO abbreviation

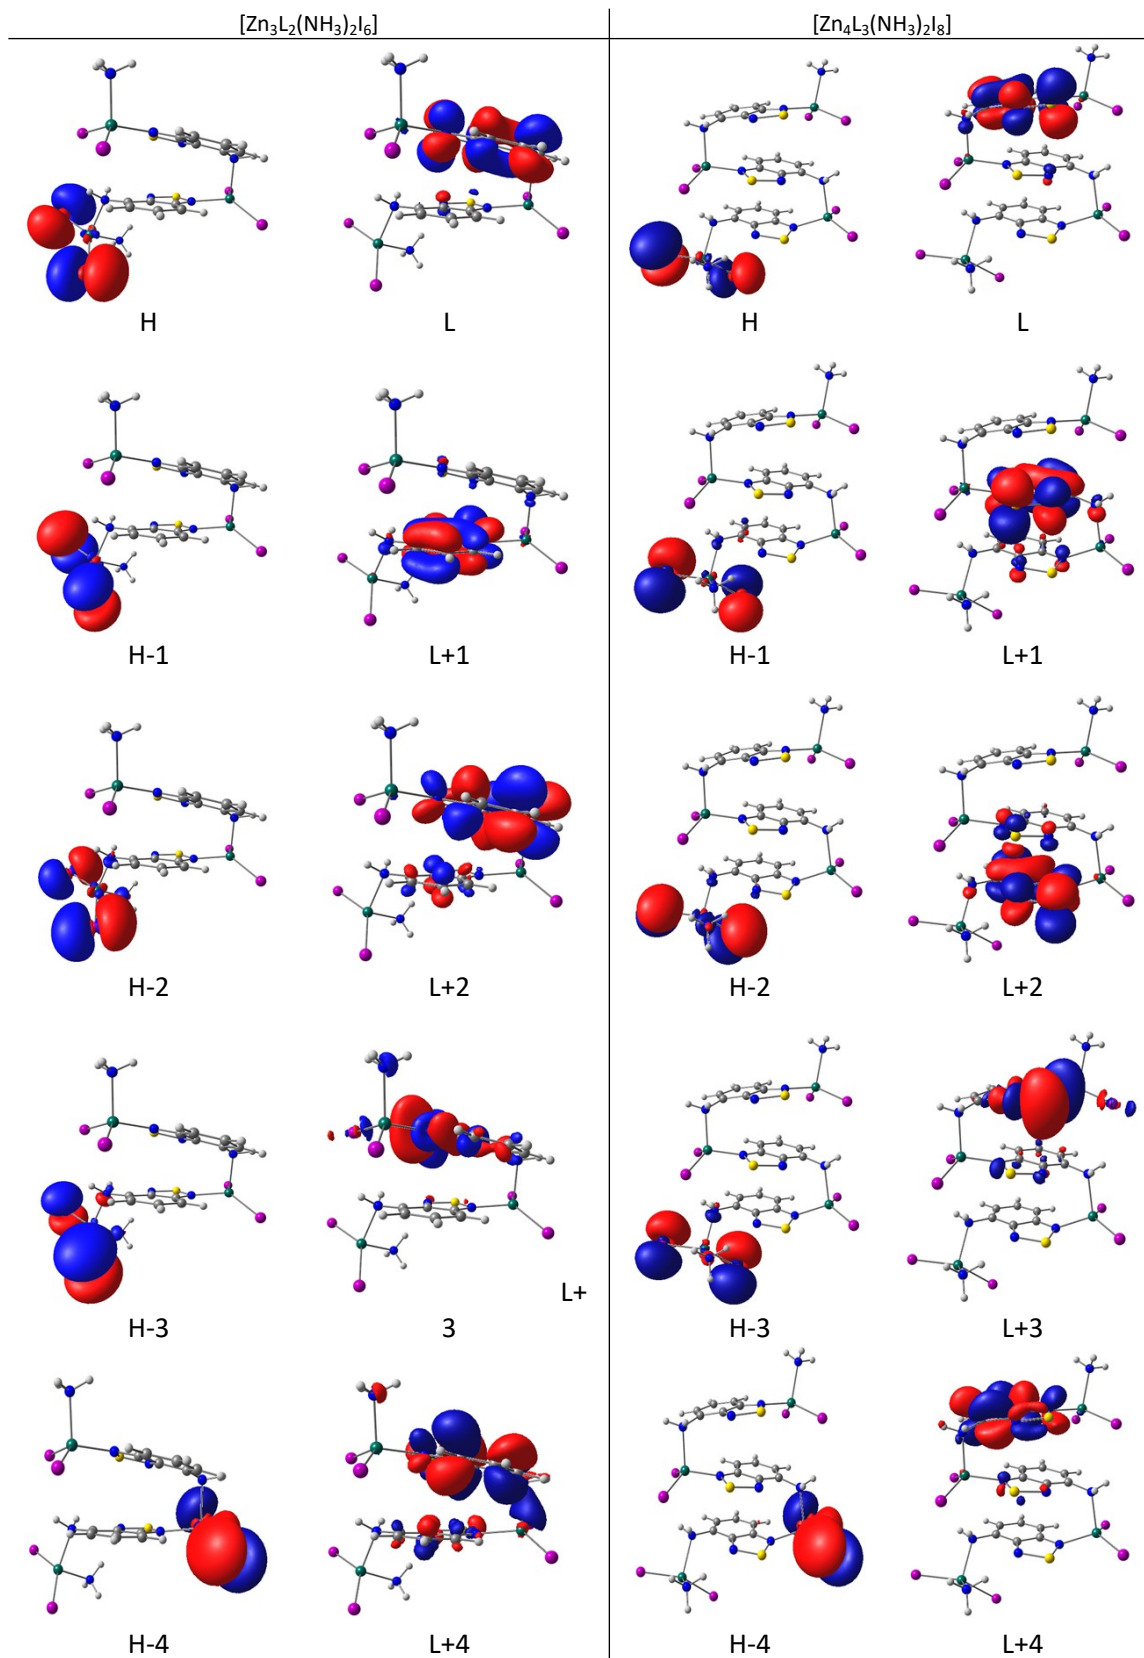

Figure S25. Frontier molecular orbitals of  $[\text{Zn}_3\text{L}_2(\text{NH}_3)_2\text{I}_6]$  and  $[\text{Zn}_4\text{L}_3(\text{NH}_3)_2\text{I}_8]$  calculated at B3LYP/def2TZVPP level (isovalue = 0.03 a.u.). H is for HOMO, L is for LUMO abbreviation

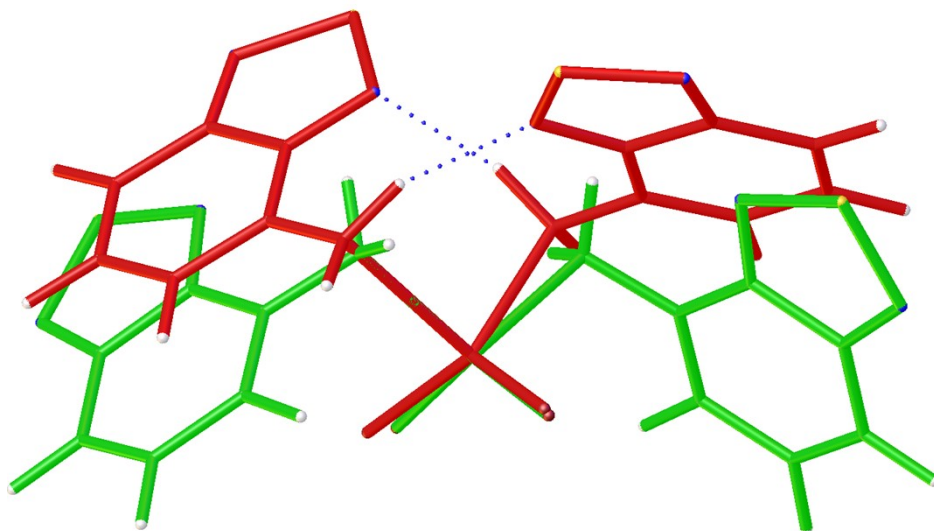

Figure S26. Overlay of optimized geometry of complex **1** in the ground state (green) and  $S_1$  state (red).

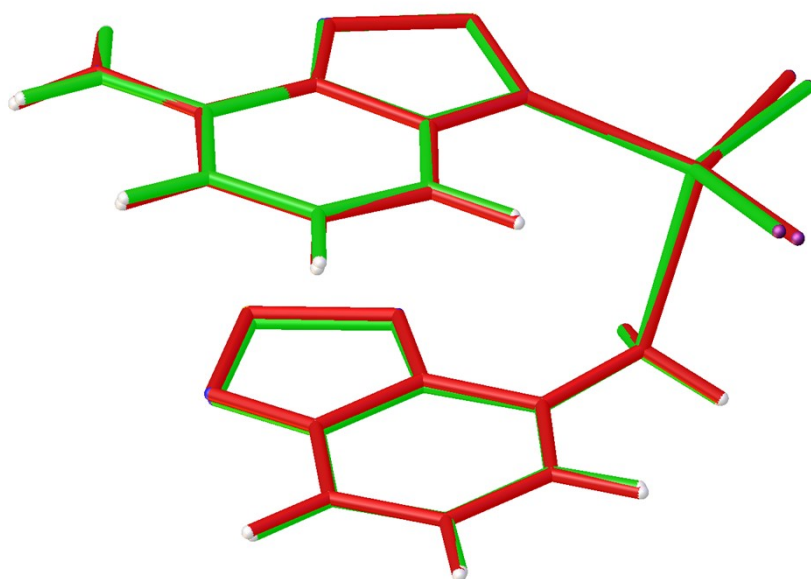

Figure S27. Overlay of optimized geometry of complex **3** in the ground state (green) and  $S_1$  state (red).

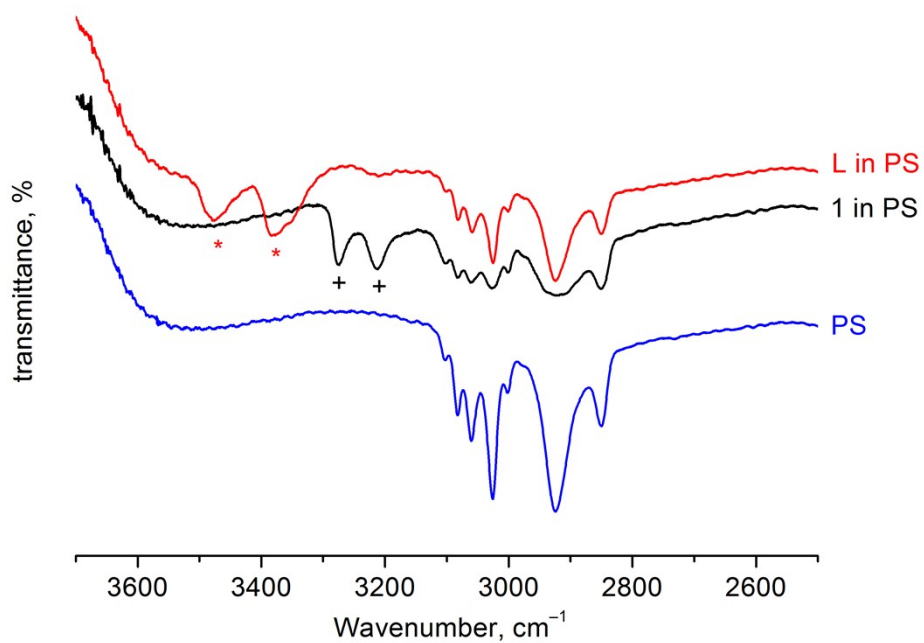

Figure S28. Infrared spectra of polystyrene (PS) (blue), L in PS film (red) and **1** in PS film (black). Bands assigned to NH-vibrations of L are marked with “\*”, while those assigned to **1** are marked with “+”.
